# Supplementary material
Source: publisher figshare collection journal article supplement (https://acs.figshare.com/ndownloader/files/5336404)
Supplement: Supplementary file 1 [file 5336404]

data_revised_3dlani

_audit_creation_method            SHELXL-97
_chemical_name_systematic
;
 ?
;
_chemical_name_common             ?
_chemical_melting_point           ?
_chemical_formula_moiety           
'C21 H40 La4 N9 Na Ni5 O45 2+, C O3 2-, 10 H2 O'
_chemical_formula_sum
 'C22 H60 La4 N9 Na Ni5 O58'
_chemical_formula_weight          2250.97

loop_
 _atom_type_symbol
 _atom_type_description
 _atom_type_scat_dispersion_real
 _atom_type_scat_dispersion_imag
 _atom_type_scat_source
 'C'  'C'   0.0033   0.0016
 'International Tables Vol C Tables 4.2.6.8 and 6.1.1.4'
 'H'  'H'   0.0000   0.0000
 'International Tables Vol C Tables 4.2.6.8 and 6.1.1.4'
 'N'  'N'   0.0061   0.0033
 'International Tables Vol C Tables 4.2.6.8 and 6.1.1.4'
 'O'  'O'   0.0106   0.0060
 'International Tables Vol C Tables 4.2.6.8 and 6.1.1.4'
 'Ni'  'Ni'   0.3393   1.1124
 'International Tables Vol C Tables 4.2.6.8 and 6.1.1.4'
 'La'  'La'  -0.2871   2.4523
 'International Tables Vol C Tables 4.2.6.8 and 6.1.1.4'
 'Na'  'Na'   0.0362   0.0249
 'International Tables Vol C Tables 4.2.6.8 and 6.1.1.4'

_symmetry_cell_setting            cubic
_symmetry_space_group_name_H-M    'P a -3'

loop_
 _symmetry_equiv_pos_as_xyz
 'x, y, z'
 '-x+1/2, -y, z+1/2'
 '-x, y+1/2, -z+1/2'
 'x+1/2, -y+1/2, -z'
 'z, x, y'
 'z+1/2, -x+1/2, -y'
 '-z+1/2, -x, y+1/2'
 '-z, x+1/2, -y+1/2'
 'y, z, x'
 '-y, z+1/2, -x+1/2'
 'y+1/2, -z+1/2, -x'
 '-y+1/2, -z, x+1/2'
 '-x, -y, -z'
 'x-1/2, y, -z-1/2'
 'x, -y-1/2, z-1/2'
 '-x-1/2, y-1/2, z'
 '-z, -x, -y'
 '-z-1/2, x-1/2, y'
 'z-1/2, x, -y-1/2'
 'z, -x-1/2, y-1/2'
 '-y, -z, -x'
 'y, -z-1/2, x-1/2'
 '-y-1/2, z-1/2, x'
 'y-1/2, z, -x-1/2'

_cell_length_a                    33.8871(13)
_cell_length_b                    33.8871(13)
_cell_length_c                    33.8871(13)
_cell_angle_alpha                 90.00
_cell_angle_beta                  90.00
_cell_angle_gamma                 90.00
_cell_volume                      38914(3)
_cell_formula_units_Z             24
_cell_measurement_temperature     113(2)
_cell_measurement_reflns_used     100
_cell_measurement_theta_min       2.5
_cell_measurement_theta_max       25

_exptl_crystal_description        block
_exptl_crystal_colour             colourless
_exptl_crystal_size_max           ?
_exptl_crystal_size_mid           ?
_exptl_crystal_size_min           ?
_exptl_crystal_density_meas       ?
_exptl_crystal_density_diffrn     2.305
_exptl_crystal_density_method     'not measured'
_exptl_crystal_F_000              26352
_exptl_absorpt_coefficient_mu     4.127
_exptl_absorpt_correction_type    multi-scan
_exptl_absorpt_correction_T_min   ?
_exptl_absorpt_correction_T_max   ?
_exptl_absorpt_process_details    ?

_exptl_special_details
;
 ?
;

_diffrn_ambient_temperature       113(2)
_diffrn_radiation_wavelength      0.71073
_diffrn_radiation_type            MoK\a
_diffrn_radiation_source          'sealed tube'
_diffrn_radiation_monochromator   graphite
_diffrn_measurement_device_type   'Bruker SMART 1000 CCD diffractometer'
_diffrn_measurement_method        'thin-slice \w scans'
_diffrn_detector_area_resol_mean  ?
_diffrn_standards_number          ?
_diffrn_standards_interval_count  ?
_diffrn_standards_interval_time   ?
_diffrn_standards_decay_%         ?
_diffrn_reflns_number             186511
_diffrn_reflns_av_R_equivalents   0.1313
_diffrn_reflns_av_sigmaI/netI     0.0470
_diffrn_reflns_limit_h_min        -40
_diffrn_reflns_limit_h_max        40
_diffrn_reflns_limit_k_min        -40
_diffrn_reflns_limit_k_max        40
_diffrn_reflns_limit_l_min        -40
_diffrn_reflns_limit_l_max        40
_diffrn_reflns_theta_min          1.34
_diffrn_reflns_theta_max          25.00
_reflns_number_total              11405
_reflns_number_gt                 9185
_reflns_threshold_expression      I>2\s(I)

_computing_data_collection        'SMART (Bruker, 2001)'
_computing_cell_refinement        'SAINT (Bruker, 2001)'
_computing_data_reduction         SAINT
_computing_structure_solution     'SHELXTL (Sheldrick, 2001)'
_computing_structure_refinement   SHELXTL
_computing_molecular_graphics     SHELXTL
_computing_publication_material   'SHELXTL and local programs'

_refine_special_details
;
 Refinement of F^2^ against ALL reflections.  The weighted R-factor wR and
 goodness of fit S are based on F^2^, conventional R-factors R are based
 on F, with F set to zero for negative F^2^. The threshold expression of
 F^2^ > 2sigma(F^2^) is used only for calculating R-factors(gt) etc. and is
 not relevant to the choice of reflections for refinement.  R-factors based
 on F^2^ are statistically about twice as large as those based on F, and R-
 factors based on ALL data will be even larger.
;

_refine_ls_structure_factor_coef  Fsqd
_refine_ls_matrix_type            full
_refine_ls_weighting_scheme       calc
_refine_ls_weighting_details
 'calc w=1/[\s^2^(Fo^2^)+(0.0947P)^2^+68.0243P] where P=(Fo^2^+2Fc^2^)/3'
_atom_sites_solution_primary      direct
_atom_sites_solution_secondary    difmap
_atom_sites_solution_hydrogens    geom
_refine_ls_hydrogen_treatment     constr
_refine_ls_extinction_method      none
_refine_ls_extinction_coef        ?
_refine_ls_number_reflns          11405
_refine_ls_number_parameters      797
_refine_ls_number_restraints      34
_refine_ls_R_factor_all           0.0641
_refine_ls_R_factor_gt            0.0522
_refine_ls_wR_factor_ref          0.1509
_refine_ls_wR_factor_gt           0.1448
_refine_ls_goodness_of_fit_ref    1.088
_refine_ls_restrained_S_all       1.098
_refine_ls_shift/su_max           0.004
_refine_ls_shift/su_mean          0.000

loop_
 _atom_site_label
 _atom_site_type_symbol
 _atom_site_fract_x
 _atom_site_fract_y
 _atom_site_fract_z
 _atom_site_U_iso_or_equiv
 _atom_site_adp_type
 _atom_site_occupancy
 _atom_site_symmetry_multiplicity
 _atom_site_calc_flag
 _atom_site_refinement_flags
 _atom_site_disorder_assembly
 _atom_site_disorder_group
La1 La -0.024093(12) 0.958750(12) 1.155988(13) 0.01785(13) Uani 1 1 d U . .
La2 La -0.009788(14) 1.080554(14) 1.150733(13) 0.02287(14) Uani 1 1 d U . .
La3 La 0.078113(13) 0.899903(15) 1.124498(13) 0.02252(14) Uani 1 1 d U . .
La4 La 0.099708(16) 1.099709(16) 1.099709(16) 0.0305(2) Uani 1 3 d SU . .
La5 La -0.247283(15) 1.252717(15) 1.247283(15) 0.02556(19) Uani 1 3 d S . .
Ni1 Ni -0.01126(3) 1.02521(3) 1.24324(3) 0.0216(2) Uani 1 1 d . . .
Ni2 Ni -0.08742(3) 1.14588(3) 1.18157(3) 0.0203(2) Uani 1 1 d . . .
Ni3 Ni 0.04970(3) 0.88660(3) 1.22348(3) 0.0190(2) Uani 1 1 d . . .
Ni4 Ni 0.08798(3) 0.79616(3) 1.10849(3) 0.0225(2) Uani 1 1 d . . .
Ni5 Ni 0.06607(3) 1.14643(3) 1.18949(3) 0.0274(3) Uani 1 1 d . . .
Na Na -0.15022(12) 1.14011(12) 1.25981(12) 0.0472(10) Uani 1 1 d . . .
O1 O 0.0076(3) 0.8876(2) 1.3338(2) 0.064(2) Uani 1 1 d . . .
O2 O 0.02699(18) 0.90705(18) 1.27502(17) 0.0320(14) Uani 1 1 d . . .
O3 O 0.07682(16) 0.78667(16) 1.16709(16) 0.0248(12) Uani 1 1 d . . .
O4 O 0.06985(16) 0.85050(15) 1.18073(15) 0.0224(12) Uani 1 1 d . . .
O5 O -0.00412(16) 0.85725(16) 1.21590(18) 0.0312(13) Uani 1 1 d . . .
O6 O -0.04950(15) 0.89968(15) 1.19667(16) 0.0225(12) Uani 1 1 d . . .
O7 O -0.14203(15) 0.81252(15) 1.14759(16) 0.0223(12) Uani 1 1 d . . .
O8 O -0.12068(16) 0.87317(15) 1.15910(16) 0.0245(12) Uani 1 1 d . . .
O9 O -0.04871(17) 0.98138(16) 1.22797(16) 0.0268(13) Uani 1 1 d . . .
O10 O -0.09992(16) 0.94777(16) 1.25129(16) 0.0275(13) Uani 1 1 d . . .
O11 O -0.08689(16) 1.11706(16) 1.23558(15) 0.0229(12) Uani 1 1 d . . .
O12 O -0.04542(15) 1.06891(15) 1.21872(15) 0.0192(11) Uani 1 1 d . . .
O13 O 0.03766(18) 1.09816(18) 1.21099(17) 0.0334(15) Uani 1 1 d . . .
O14 O 0.02754(17) 1.06467(16) 1.26636(17) 0.0289(13) Uani 1 1 d . . .
O15 O 0.17319(19) 1.09534(18) 1.19600(16) 0.0333(14) Uani 1 1 d . . .
O16 O 0.11382(17) 1.11256(16) 1.17475(16) 0.0268(13) Uani 1 1 d . . .
O17 O 0.02207(17) 1.18166(19) 1.2094(2) 0.0393(17) Uani 1 1 d . . .
O18 O -0.02718(16) 1.14811(16) 1.18241(16) 0.0251(13) Uani 1 1 d . . .
O19 O -0.08849(16) 1.17745(16) 1.12976(15) 0.0246(12) Uani 1 1 d . . .
O20 O -0.09006(17) 1.23744(16) 1.10478(15) 0.0246(12) Uani 1 1 d . . .
N6 N -0.2386(2) 1.1629(2) 1.2607(2) 0.0322(17) Uani 1 1 d D . .
O21 O -0.2347(2) 1.12767(17) 1.2674(2) 0.0439(17) Uani 1 1 d D . .
O22 O -0.20869(18) 1.18572(19) 1.26026(19) 0.0372(15) Uani 1 1 d D . .
O23 O -0.27154(18) 1.17818(19) 1.25318(19) 0.0393(16) Uani 1 1 d D . .
N7 N -0.1983(2) 1.2290(2) 1.1757(2) 0.0375(19) Uani 1 1 d D . .
O24 O -0.1798(2) 1.2219(2) 1.14558(19) 0.0521(19) Uani 1 1 d D . .
O25 O -0.23339(18) 1.21693(18) 1.18063(19) 0.0340(14) Uani 1 1 d D . .
O26 O -0.18319(19) 1.2482(2) 1.20354(17) 0.0380(15) Uani 1 1 d D . .
N8 N -0.0218(2) 0.9030(2) 1.0851(2) 0.0316(17) Uani 1 1 d D . .
O27 O 0.00577(15) 0.90549(16) 1.11191(15) 0.0222(12) Uani 1 1 d D . .
O28 O -0.01982(15) 0.87903(15) 1.05622(15) 0.0207(12) Uani 1 1 d D . .
O29 O -0.05163(15) 0.92535(15) 1.09180(16) 0.0240(12) Uani 1 1 d D . .
N9 N -0.1848(4) 1.0474(3) 1.2640(3) 0.075(3) Uani 1 1 d . . .
O30 O -0.1950(4) 1.0516(4) 1.2987(3) 0.108(2) Uani 1 1 d . . .
O31 O -0.1629(4) 1.0687(4) 1.2458(3) 0.108(2) Uani 1 1 d . . .
O32 O -0.2012(4) 1.0253(4) 1.2458(3) 0.108(2) Uani 1 1 d . . .
C21 C 0.1107(4) 1.0076(5) 1.2278(4) 0.078(4) Uani 1 1 d D . .
O33 O 0.0988(5) 1.0084(6) 1.2635(4) 0.163(7) Uani 1 1 d D . .
O34 O 0.1466(3) 1.0068(6) 1.2322(6) 0.191(8) Uani 1 1 d D . .
O35 O 0.0864(3) 1.0076(3) 1.1969(3) 0.096(4) Uani 1 1 d D . .
C22 C 0.0583(3) 0.9961(4) 1.1018(4) 0.114(7) Uani 1 1 d DU . .
O36 O 0.02147(18) 0.9894(2) 1.1034(3) 0.079(3) Uani 1 1 d DU . .
O37 O 0.08371(18) 0.9758(3) 1.1136(2) 0.073(3) Uani 1 1 d D . .
O38 O 0.0773(3) 1.0137(3) 1.0712(3) 0.089(3) Uani 1 1 d D . .
O39 O -0.09668(15) 0.95151(15) 1.16115(16) 0.0238(12) Uani 1 1 d . . .
O40 O 0.04314(16) 1.12994(16) 1.13722(17) 0.0271(13) Uani 1 1 d . . .
O41 O -0.07983(16) 1.09904(15) 1.14539(15) 0.0222(12) Uani 1 1 d . . .
O42 O 0.03994(14) 0.93040(14) 1.18284(15) 0.0177(11) Uani 1 1 d . . .
O43 O 0.00907(16) 1.01783(15) 1.18695(17) 0.0266(13) Uani 1 1 d . . .
O44 O 0.0261(2) 0.98560(19) 1.2707(2) 0.052(2) Uani 1 1 d . . .
O46 O -0.1224(2) 1.2040(2) 1.2795(2) 0.053(2) Uani 1 1 d . . .
O47 O -0.1538(3) 1.1217(3) 1.3259(3) 0.075(3) Uani 1 1 d . . .
O48 O 0.0566(3) 1.0471(3) 1.1287(5) 0.133(6) Uani 1 1 d . . .
N1 N 0.0628(2) 0.8384(2) 1.25805(18) 0.0234(15) Uani 1 1 d . . .
H1A H 0.0887 0.8409 1.2668 0.028 Uiso 1 1 calc R . .
N2 N -0.10727(19) 0.86033(19) 1.2369(2) 0.0238(15) Uani 1 1 d . . .
H2C H -0.1223 0.8636 1.2596 0.029 Uiso 1 1 calc R . .
N3 N -0.0500(2) 1.03341(19) 1.28989(18) 0.0251(15) Uani 1 1 d . . .
H3C H -0.0360 1.0324 1.3135 0.030 Uiso 1 1 calc R . .
N4 N 0.0936(2) 1.1455(2) 1.2445(2) 0.0328(18) Uani 1 1 d . . .
H4A H 0.0914 1.1702 1.2562 0.039 Uiso 1 1 calc R . .
N5 N -0.0810(2) 1.20295(19) 1.20570(19) 0.0231(15) Uani 1 1 d . . .
H5A H -0.1001 1.2068 1.2250 0.028 Uiso 1 1 calc R . .
C1 C 0.0233(3) 0.8810(3) 1.3013(3) 0.033(2) Uani 1 1 d . . .
C2 C 0.0370(3) 0.8393(3) 1.2923(2) 0.033(2) Uani 1 1 d . . .
H2A H 0.0512 0.8285 1.3155 0.040 Uiso 1 1 calc R . .
H2B H 0.0137 0.8223 1.2873 0.040 Uiso 1 1 calc R . .
C3 C 0.0604(2) 0.8035(2) 1.2330(2) 0.0220(17) Uani 1 1 d . . .
H3A H 0.0336 0.7920 1.2348 0.026 Uiso 1 1 calc R . .
H3B H 0.0795 0.7834 1.2424 0.026 Uiso 1 1 calc R . .
C4 C 0.0695(2) 0.8141(2) 1.1900(3) 0.0271(19) Uani 1 1 d . . .
C5 C -0.0373(2) 0.8716(2) 1.2176(2) 0.0219(17) Uani 1 1 d . . .
C6 C -0.0661(2) 0.8538(3) 1.2477(3) 0.031(2) Uani 1 1 d . . .
H6A H -0.0612 0.8251 1.2498 0.037 Uiso 1 1 calc R . .
H6B H -0.0612 0.8657 1.2739 0.037 Uiso 1 1 calc R . .
C7 C -0.1243(3) 0.8283(2) 1.2126(2) 0.0295(19) Uani 1 1 d . . .
H7A H -0.1504 0.8211 1.2236 0.035 Uiso 1 1 calc R . .
H7B H -0.1071 0.8048 1.2147 0.035 Uiso 1 1 calc R . .
C8 C -0.1294(2) 0.8382(2) 1.1695(2) 0.0208(17) Uani 1 1 d . . .
C9 C -0.0760(2) 0.9746(2) 1.2529(2) 0.0264(19) Uani 1 1 d . . .
C10 C -0.0782(3) 1.0012(3) 1.2889(3) 0.047(3) Uani 1 1 d . . .
H10A H -0.1051 1.0126 1.2902 0.056 Uiso 1 1 calc R . .
H10B H -0.0744 0.9849 1.3127 0.056 Uiso 1 1 calc R . .
C11 C -0.0670(3) 1.0729(3) 1.2853(3) 0.033(2) Uani 1 1 d . . .
H11A H -0.0521 1.0917 1.3020 0.040 Uiso 1 1 calc R . .
H11B H -0.0946 1.0725 1.2947 0.040 Uiso 1 1 calc R . .
C12 C -0.0664(2) 1.0875(2) 1.2430(2) 0.0176(16) Uani 1 1 d . . .
C13 C 0.0441(2) 1.0909(3) 1.2471(2) 0.0261(19) Uani 1 1 d . . .
C14 C 0.0737(3) 1.1164(3) 1.2689(3) 0.043(3) Uani 1 1 d . . .
H14A H 0.0599 1.1303 1.2906 0.052 Uiso 1 1 calc R . .
H14B H 0.0939 1.0991 1.2810 0.052 Uiso 1 1 calc R . .
C15 C 0.1354(3) 1.1367(3) 1.2371(3) 0.043(3) Uani 1 1 d . . .
H15A H 0.1465 1.1222 1.2599 0.052 Uiso 1 1 calc R . .
H15B H 0.1502 1.1618 1.2344 0.052 Uiso 1 1 calc R . .
C16 C 0.1411(3) 1.1126(2) 1.2003(2) 0.0255(18) Uani 1 1 d . . .
C17 C -0.0128(2) 1.1756(2) 1.2027(2) 0.0249(18) Uani 1 1 d . . .
C18 C -0.0424(3) 1.2038(3) 1.2238(3) 0.033(2) Uani 1 1 d . . .
H18A H -0.0447 1.1961 1.2518 0.040 Uiso 1 1 calc R . .
H18B H -0.0319 1.2311 1.2228 0.040 Uiso 1 1 calc R . .
C19 C -0.0867(3) 1.2325(2) 1.1739(2) 0.0289(19) Uani 1 1 d . . .
H19A H -0.0648 1.2518 1.1749 0.035 Uiso 1 1 calc R . .
H19B H -0.1116 1.2469 1.1787 0.035 Uiso 1 1 calc R . .
C20 C -0.0881(2) 1.2145(2) 1.1333(2) 0.0208(17) Uani 1 1 d . . .
O45 O 0.0389(3) 1.0137(4) 0.9657(4) 0.121(5) Uani 1 1 d . . .
La6 La 0.0239(11) 1.0251(8) 1.0218(6) 0.0249(13) Uani 0.2022(14) 1 d PU . -1

loop_
 _atom_site_aniso_label
 _atom_site_aniso_U_11
 _atom_site_aniso_U_22
 _atom_site_aniso_U_33
 _atom_site_aniso_U_23
 _atom_site_aniso_U_13
 _atom_site_aniso_U_12
La1 0.0168(2) 0.0127(2) 0.0240(2) 0.00021(17) -0.00473(17) -0.00042(16)
La2 0.0283(3) 0.0220(2) 0.0183(2) -0.00666(18) 0.00695(18) -0.01062(19)
La3 0.0127(2) 0.0398(3) 0.0150(2) -0.0063(2) 0.00001(17) -0.00210(19)
La4 0.0305(2) 0.0305(2) 0.0305(2) 0.0012(2) 0.0012(2) 0.0012(2)
La5 0.02556(19) 0.02556(19) 0.02556(19) -0.0008(2) -0.0008(2) 0.0008(2)
Ni1 0.0244(6) 0.0162(5) 0.0241(5) -0.0012(4) -0.0071(4) -0.0003(4)
Ni2 0.0289(6) 0.0180(5) 0.0140(5) -0.0036(4) -0.0016(4) 0.0018(4)
Ni3 0.0193(5) 0.0217(5) 0.0162(5) 0.0029(4) 0.0006(4) 0.0021(4)
Ni4 0.0173(5) 0.0290(6) 0.0213(5) -0.0058(4) -0.0011(4) 0.0004(4)
Ni5 0.0280(6) 0.0247(6) 0.0294(6) -0.0140(5) 0.0087(5) -0.0106(5)
Na 0.050(2) 0.051(2) 0.041(2) -0.0057(19) 0.0003(19) 0.0127(19)
O1 0.098(7) 0.061(5) 0.032(4) 0.011(3) 0.035(4) 0.030(5)
O2 0.039(4) 0.036(3) 0.021(3) -0.008(3) 0.007(3) 0.006(3)
O3 0.031(3) 0.022(3) 0.021(3) -0.005(2) 0.003(2) -0.002(2)
O4 0.028(3) 0.022(3) 0.018(3) 0.000(2) 0.003(2) -0.003(2)
O5 0.015(3) 0.026(3) 0.052(4) 0.006(3) -0.008(3) 0.001(3)
O6 0.015(3) 0.023(3) 0.029(3) 0.005(2) -0.003(2) 0.001(2)
O7 0.023(3) 0.019(3) 0.025(3) 0.000(2) 0.002(2) -0.005(2)
O8 0.030(3) 0.016(3) 0.028(3) -0.002(2) -0.003(2) -0.001(2)
O9 0.030(3) 0.023(3) 0.028(3) -0.008(2) -0.008(3) -0.007(2)
O10 0.030(3) 0.024(3) 0.028(3) -0.004(2) -0.005(2) -0.009(3)
O11 0.023(3) 0.025(3) 0.020(3) 0.000(2) 0.002(2) 0.009(2)
O12 0.022(3) 0.020(3) 0.016(3) 0.001(2) -0.002(2) 0.001(2)
O13 0.036(3) 0.038(4) 0.027(3) -0.012(3) 0.009(3) -0.021(3)
O14 0.033(3) 0.023(3) 0.031(3) -0.005(3) -0.008(3) -0.008(3)
O15 0.044(4) 0.036(3) 0.020(3) -0.005(3) -0.010(3) 0.012(3)
O16 0.031(3) 0.022(3) 0.027(3) -0.005(2) 0.006(3) -0.005(2)
O17 0.018(3) 0.040(4) 0.059(4) -0.031(3) 0.010(3) -0.002(3)
O18 0.025(3) 0.028(3) 0.022(3) -0.010(2) 0.009(2) -0.007(2)
O19 0.032(3) 0.021(3) 0.020(3) -0.002(2) -0.002(2) -0.001(2)
O20 0.034(3) 0.020(3) 0.020(3) -0.003(2) -0.001(2) 0.003(2)
N6 0.038(5) 0.038(5) 0.020(4) 0.001(3) 0.008(3) 0.007(4)
O21 0.066(5) 0.019(3) 0.047(4) 0.006(3) 0.008(4) 0.007(3)
O22 0.028(3) 0.040(4) 0.044(4) -0.001(3) -0.003(3) 0.000(3)
O23 0.034(4) 0.040(4) 0.044(4) -0.006(3) -0.005(3) 0.003(3)
N7 0.052(5) 0.034(4) 0.027(4) -0.004(3) 0.000(4) 0.011(4)
O24 0.061(5) 0.072(5) 0.023(4) -0.006(3) 0.006(3) 0.000(4)
O25 0.029(3) 0.032(3) 0.041(4) -0.003(3) -0.004(3) -0.001(3)
O26 0.040(4) 0.050(4) 0.024(3) -0.011(3) -0.002(3) -0.001(3)
N8 0.025(4) 0.033(4) 0.038(4) -0.008(3) -0.002(3) -0.013(3)
O27 0.017(3) 0.029(3) 0.020(3) -0.004(2) -0.002(2) 0.000(2)
O28 0.027(3) 0.020(3) 0.016(3) -0.002(2) -0.002(2) -0.006(2)
O29 0.022(3) 0.019(3) 0.031(3) -0.004(2) -0.006(2) 0.004(2)
N9 0.107(9) 0.067(7) 0.050(6) -0.034(5) 0.009(6) -0.028(7)
O30 0.131(6) 0.120(5) 0.074(4) -0.031(4) 0.059(4) -0.052(4)
O31 0.131(6) 0.120(5) 0.074(4) -0.031(4) 0.059(4) -0.052(4)
O32 0.131(6) 0.120(5) 0.074(4) -0.031(4) 0.059(4) -0.052(4)
C21 0.076(10) 0.080(10) 0.078(10) -0.018(8) 0.017(8) -0.004(8)
O33 0.147(13) 0.27(2) 0.074(8) 0.001(11) -0.002(8) 0.032(14)
O34 0.049(7) 0.25(2) 0.27(2) -0.065(17) -0.004(9) -0.043(10)
O35 0.135(9) 0.104(8) 0.049(5) -0.033(5) 0.011(6) -0.052(7)
C22 0.056(7) 0.164(14) 0.122(12) 0.130(12) -0.051(8) -0.073(9)
O36 0.023(3) 0.033(4) 0.181(10) 0.055(5) -0.034(5) -0.015(3)
O37 0.015(3) 0.128(8) 0.077(6) -0.083(6) -0.010(4) 0.008(4)
O38 0.083(7) 0.106(8) 0.078(7) 0.002(6) 0.009(5) 0.000(6)
O39 0.019(3) 0.021(3) 0.031(3) 0.002(2) -0.007(2) 0.002(2)
O40 0.023(3) 0.025(3) 0.033(3) -0.015(3) 0.004(2) -0.004(2)
O41 0.033(3) 0.017(3) 0.016(3) -0.005(2) -0.001(2) -0.001(2)
O42 0.019(3) 0.017(3) 0.018(3) 0.005(2) -0.003(2) 0.000(2)
O43 0.027(3) 0.017(3) 0.035(3) -0.008(2) -0.003(2) 0.002(2)
O44 0.058(5) 0.027(3) 0.072(5) -0.004(3) -0.030(4) 0.010(3)
O46 0.047(4) 0.068(5) 0.044(4) 0.008(4) 0.015(3) 0.026(4)
O47 0.091(7) 0.068(6) 0.067(6) 0.004(5) 0.009(5) 0.012(5)
O48 0.040(5) 0.041(5) 0.317(18) 0.084(8) 0.013(8) 0.005(4)
N1 0.023(4) 0.029(4) 0.018(3) 0.004(3) -0.001(3) 0.003(3)
N2 0.022(4) 0.023(4) 0.026(4) -0.004(3) 0.000(3) -0.003(3)
N3 0.042(4) 0.020(3) 0.013(3) -0.001(3) -0.009(3) -0.003(3)
N4 0.029(4) 0.041(4) 0.028(4) -0.021(3) 0.004(3) -0.012(3)
N5 0.027(4) 0.023(4) 0.019(3) -0.003(3) 0.000(3) 0.001(3)
C1 0.039(5) 0.032(5) 0.028(5) 0.007(4) 0.006(4) 0.006(4)
C2 0.039(5) 0.040(5) 0.020(4) 0.013(4) 0.003(4) 0.000(4)
C3 0.029(4) 0.014(4) 0.023(4) 0.000(3) 0.001(3) 0.004(3)
C4 0.020(4) 0.026(5) 0.036(5) 0.000(4) 0.000(4) -0.002(3)
C5 0.024(4) 0.017(4) 0.024(4) 0.004(3) -0.005(3) -0.009(3)
C6 0.020(4) 0.040(5) 0.033(5) 0.019(4) -0.007(4) -0.008(4)
C7 0.038(5) 0.025(4) 0.025(4) 0.006(4) -0.002(4) -0.006(4)
C8 0.016(4) 0.012(4) 0.035(5) 0.002(3) 0.005(3) 0.004(3)
C9 0.027(4) 0.029(5) 0.024(4) 0.006(4) -0.003(4) 0.002(4)
C10 0.060(6) 0.043(6) 0.038(5) -0.007(5) 0.015(5) -0.025(5)
C11 0.037(5) 0.035(5) 0.028(5) 0.001(4) 0.002(4) 0.005(4)
C12 0.015(4) 0.023(4) 0.015(4) 0.002(3) 0.003(3) -0.006(3)
C13 0.017(4) 0.036(5) 0.025(5) -0.012(4) -0.002(3) 0.001(4)
C14 0.051(6) 0.047(6) 0.032(5) -0.013(4) 0.003(5) -0.023(5)
C15 0.028(5) 0.068(7) 0.033(5) -0.024(5) 0.007(4) -0.016(5)
C16 0.032(5) 0.026(4) 0.018(4) -0.002(3) -0.006(4) -0.016(4)
C17 0.035(5) 0.016(4) 0.024(4) -0.005(3) 0.011(4) -0.001(3)
C18 0.032(5) 0.040(5) 0.027(5) -0.011(4) -0.010(4) 0.001(4)
C19 0.038(5) 0.023(4) 0.025(4) -0.001(4) -0.001(4) 0.002(4)
C20 0.022(4) 0.015(4) 0.026(4) -0.003(3) 0.000(3) 0.002(3)
O45 0.091(8) 0.160(12) 0.111(9) 0.048(9) -0.010(7) 0.013(8)
La6 0.0245(15) 0.0249(16) 0.0253(16) -0.0003(10) 0.0007(10) 0.0009(10)

_geom_special_details
;
 All esds (except the esd in the dihedral angle between two l.s. planes)
 are estimated using the full covariance matrix.  The cell esds are taken
 into account individually in the estimation of esds in distances, angles
 and torsion angles; correlations between esds in cell parameters are only
 used when they are defined by crystal symmetry.  An approximate (isotropic)
 treatment of cell esds is used for estimating esds involving l.s. planes.
;

loop_
 _geom_bond_atom_site_label_1
 _geom_bond_atom_site_label_2
 _geom_bond_distance
 _geom_bond_site_symmetry_2
 _geom_bond_publ_flag
La1 O39 2.478(5) . ?
La1 O43 2.524(5) . ?
La1 O42 2.541(5) . ?
La1 O27 2.552(5) . ?
La1 O36 2.576(9) . ?
La1 O6 2.579(5) . ?
La1 O28 2.622(5) 17_667 ?
La1 O29 2.624(5) . ?
La1 O9 2.690(6) . ?
La1 N8 3.057(7) . ?
La1 La3 4.0893(6) 17_667 ?
La1 La3 4.1365(6) . ?
La2 O41 2.461(6) . ?
La2 O40 2.495(5) . ?
La2 O43 2.536(5) . ?
La2 O37 2.579(7) 9_456 ?
La2 O18 2.596(5) . ?
La2 O48 2.628(10) . ?
La2 O38 2.631(10) 9_456 ?
La2 O12 2.631(5) . ?
La2 O13 2.667(6) . ?
La2 O28 2.780(5) 17_667 ?
La2 Ni2 3.5934(11) . ?
La2 La4 4.1447(6) . ?
La3 O39 2.485(5) 21_676 ?
La3 O29 2.488(5) 21_676 ?
La3 O27 2.496(5) . ?
La3 O41 2.532(5) 5_465 ?
La3 O19 2.538(5) 5_465 ?
La3 O4 2.552(5) . ?
La3 O42 2.579(5) . ?
La3 O8 2.596(5) 21_676 ?
La3 O37 2.606(10) . ?
La3 Ni3 3.5187(10) . ?
La3 Ni4 3.5728(12) . ?
La3 Ni2 3.6058(10) 5_465 ?
La4 O48 2.504(8) 5_465 ?
La4 O48 2.504(8) 9_456 ?
La4 O48 2.504(8) . ?
La4 O40 2.518(5) 9_456 ?
La4 O40 2.518(5) 5_465 ?
La4 O40 2.518(5) . ?
La4 O16 2.624(6) . ?
La4 O16 2.624(6) 5_465 ?
La4 O16 2.624(6) 9_456 ?
La4 Ni5 3.6142(11) . ?
La4 Ni5 3.6143(11) 9_456 ?
La4 Ni5 3.6143(11) 5_465 ?
La5 O25 2.607(6) . ?
La5 O25 2.607(6) 11_376 ?
La5 O25 2.607(6) 8_667 ?
La5 O26 2.634(6) 11_376 ?
La5 O26 2.634(6) 8_667 ?
La5 O26 2.634(6) . ?
La5 O22 2.657(6) 11_376 ?
La5 O22 2.657(6) . ?
La5 O22 2.657(6) 8_667 ?
La5 O23 2.664(7) 11_376 ?
La5 O23 2.664(7) . ?
La5 O23 2.664(7) 8_667 ?
Ni1 O9 2.021(5) . ?
Ni1 O14 2.032(5) . ?
Ni1 O43 2.043(6) . ?
Ni1 O12 2.055(5) . ?
Ni1 O44 2.066(7) . ?
Ni1 N3 2.074(7) . ?
Ni2 O41 2.022(5) . ?
Ni2 O18 2.043(6) . ?
Ni2 O7 2.053(5) 17_667 ?
Ni2 O19 2.056(5) . ?
Ni2 O11 2.075(5) . ?
Ni2 N5 2.111(7) . ?
Ni2 Na 3.405(4) . ?
Ni2 La3 3.6056(10) 9_456 ?
Ni3 O4 2.015(5) . ?
Ni3 O2 2.030(6) . ?
Ni3 O42 2.052(5) . ?
Ni3 N1 2.059(6) . ?
Ni3 O20 2.082(5) 5_465 ?
Ni3 O5 2.093(6) . ?
Ni4 O39 2.011(6) 21_676 ?
Ni4 O10 2.034(6) 21_676 ?
Ni4 O3 2.047(5) . ?
Ni4 O8 2.050(5) 21_676 ?
Ni4 O6 2.056(5) 21_676 ?
Ni4 N2 2.079(7) 21_676 ?
Ni5 O40 2.013(6) . ?
Ni5 O17 2.026(6) . ?
Ni5 O15 2.027(6) 9_456 ?
Ni5 O13 2.033(6) . ?
Ni5 O16 2.046(6) . ?
Ni5 N4 2.086(7) . ?
Na O47 2.328(10) . ?
Na O11 2.427(6) . ?
Na O7 2.453(6) 17_667 ?
Na O46 2.454(9) . ?
Na O31 2.504(12) . ?
Na O22 2.513(7) . ?
Na O21 2.906(9) . ?
O1 C1 1.244(11) . ?
O2 C1 1.259(10) . ?
O3 C4 1.236(10) . ?
O4 C4 1.273(10) . ?
O5 C5 1.226(10) . ?
O6 C5 1.257(9) . ?
O6 Ni4 2.057(5) 17_667 ?
O7 C8 1.222(9) . ?
O7 Ni2 2.053(5) 21_676 ?
O7 Na 2.453(6) 21_676 ?
O8 C8 1.271(9) . ?
O8 Ni4 2.050(5) 17_667 ?
O8 La3 2.596(5) 17_667 ?
O9 C9 1.274(10) . ?
O10 C9 1.219(10) . ?
O10 Ni4 2.034(5) 17_667 ?
O11 C12 1.244(9) . ?
O12 C12 1.257(9) . ?
O13 C13 1.268(10) . ?
O14 C13 1.237(10) . ?
O15 C16 1.244(10) . ?
O15 Ni5 2.027(6) 5_465 ?
O16 C16 1.266(10) . ?
O17 C17 1.222(10) . ?
O18 C17 1.257(9) . ?
O19 C20 1.261(9) . ?
O19 La3 2.537(5) 9_456 ?
O20 C20 1.242(9) . ?
O20 Ni3 2.082(5) 9_456 ?
N6 O21 1.223(9) . ?
N6 O23 1.256(8) . ?
N6 O22 1.276(9) . ?
N7 O24 1.222(9) . ?
N7 O26 1.256(9) . ?
N7 O25 1.268(9) . ?
N8 O28 1.274(8) . ?
N8 O29 1.283(8) . ?
N8 O27 1.306(8) . ?
O28 La1 2.622(5) 21_676 ?
O28 La2 2.780(5) 21_676 ?
O29 La3 2.488(5) 17_667 ?
N9 O32 1.117(13) . ?
N9 O31 1.205(14) . ?
N9 O30 1.233(13) . ?
C21 O34 1.223(13) . ?
C21 O33 1.278(13) . ?
C21 O35 1.333(13) . ?
C22 O37 1.173(12) . ?
C22 O36 1.269(11) . ?
C22 O38 1.357(12) . ?
C22 La6 3.00(3) 9_456 ?
C22 La6 3.03(4) 5_465 ?
C22 La6 3.11(2) . ?
O36 La6 2.90(4) 5_465 ?
O36 La6 2.91(4) 9_456 ?
O36 La6 3.02(2) . ?
O37 La2 2.579(7) 5_465 ?
O38 La6 2.40(2) 9_456 ?
O38 La6 2.47(3) 5_465 ?
O38 La6 2.50(3) . ?
O38 La2 2.631(10) 5_465 ?
O39 Ni4 2.011(6) 17_667 ?
O39 La3 2.485(5) 17_667 ?
O41 La3 2.532(5) 9_456 ?
N1 C2 1.455(10) . ?
N1 C3 1.459(10) . ?
N1 H1A 0.9300 . ?
N2 C6 1.458(10) . ?
N2 C7 1.480(10) . ?
N2 Ni4 2.079(7) 17_667 ?
N2 H2C 0.9300 . ?
N3 C10 1.451(11) . ?
N3 C11 1.466(11) . ?
N3 H3C 0.9300 . ?
N4 C14 1.451(12) . ?
N4 C15 1.472(11) . ?
N4 H4A 0.9300 . ?
N5 C18 1.446(10) . ?
N5 C19 1.484(10) . ?
N5 H5A 0.9300 . ?
C1 C2 1.520(13) . ?
C2 H2A 0.9900 . ?
C2 H2B 0.9900 . ?
C3 C4 1.533(11) . ?
C3 H3A 0.9900 . ?
C3 H3B 0.9900 . ?
C5 C6 1.535(11) . ?
C6 H6A 0.9900 . ?
C6 H6B 0.9900 . ?
C7 C8 1.508(11) . ?
C7 H7A 0.9900 . ?
C7 H7B 0.9900 . ?
C9 C10 1.518(13) . ?
C10 H10A 0.9900 . ?
C10 H10B 0.9900 . ?
C11 C12 1.515(11) . ?
C11 H11A 0.9900 . ?
C11 H11B 0.9900 . ?
C13 C14 1.516(12) . ?
C14 H14A 0.9900 . ?
C14 H14B 0.9900 . ?
C15 C16 1.501(12) . ?
C15 H15A 0.9900 . ?
C15 H15B 0.9900 . ?
C17 C18 1.556(11) . ?
C18 H18A 0.9900 . ?
C18 H18B 0.9900 . ?
C19 C20 1.505(11) . ?
C19 H19A 0.9900 . ?
C19 H19B 0.9900 . ?
O45 La6 2.00(3) . ?
O45 La6 2.04(4) 9_456 ?
O45 La6 2.12(3) 5_465 ?
O45 La6 2.44(2) 17_667 ?
O45 La6 2.51(3) 21_676 ?
O45 La6 2.54(3) 13_577 ?
La6 O45 2.04(4) 5_465 ?
La6 O45 2.13(3) 9_456 ?
La6 O38 2.40(2) 5_465 ?
La6 O45 2.44(2) 21_676 ?
La6 O38 2.47(3) 9_456 ?
La6 O45 2.51(3) 17_667 ?
La6 O45 2.54(3) 13_577 ?
La6 O36 2.90(4) 9_456 ?
La6 O36 2.91(4) 5_465 ?
La6 C22 3.00(3) 5_465 ?

loop_
 _geom_angle_atom_site_label_1
 _geom_angle_atom_site_label_2
 _geom_angle_atom_site_label_3
 _geom_angle
 _geom_angle_site_symmetry_1
 _geom_angle_site_symmetry_3
 _geom_angle_publ_flag
O39 La1 O43 119.42(18) . . ?
O39 La1 O42 141.70(17) . . ?
O43 La1 O42 76.75(17) . . ?
O39 La1 O27 111.40(17) . . ?
O43 La1 O27 128.88(17) . . ?
O42 La1 O27 66.65(16) . . ?
O39 La1 O36 133.1(2) . . ?
O43 La1 O36 72.6(3) . . ?
O42 La1 O36 83.59(18) . . ?
O27 La1 O36 69.1(2) . . ?
O39 La1 O6 63.51(17) . . ?
O43 La1 O6 122.83(18) . . ?
O42 La1 O6 78.48(16) . . ?
O27 La1 O6 84.05(17) . . ?
O36 La1 O6 152.0(2) . . ?
O39 La1 O28 72.42(17) . 17_667 ?
O43 La1 O28 75.34(17) . 17_667 ?
O42 La1 O28 144.56(16) . 17_667 ?
O27 La1 O28 117.26(16) . 17_667 ?
O36 La1 O28 67.52(18) . 17_667 ?
O6 La1 O28 135.72(16) . 17_667 ?
O39 La1 O29 70.29(17) . . ?
O43 La1 O29 147.69(18) . . ?
O42 La1 O29 115.94(16) . . ?
O27 La1 O29 49.50(16) . . ?
O36 La1 O29 79.3(2) . . ?
O6 La1 O29 89.40(17) . . ?
O28 La1 O29 79.50(16) 17_667 . ?
O39 La1 O9 69.91(17) . . ?
O43 La1 O9 62.28(17) . . ?
O42 La1 O9 92.74(17) . . ?
O27 La1 O9 148.81(17) . . ?
O36 La1 O9 134.3(2) . . ?
O6 La1 O9 68.47(17) . . ?
O28 La1 O9 93.24(16) 17_667 . ?
O29 La1 O9 139.88(17) . . ?
O39 La1 N8 91.13(18) . . ?
O43 La1 N8 143.64(19) . . ?
O42 La1 N8 91.49(17) . . ?
O27 La1 N8 24.89(17) . . ?
O36 La1 N8 72.0(3) . . ?
O6 La1 N8 87.08(19) . . ?
O28 La1 N8 98.20(18) 17_667 . ?
O29 La1 N8 24.63(16) . . ?
O9 La1 N8 153.75(18) . . ?
O39 La1 La3 34.57(13) . 17_667 ?
O43 La1 La3 143.63(12) . 17_667 ?
O42 La1 La3 139.53(11) . 17_667 ?
O27 La1 La3 80.96(11) . 17_667 ?
O36 La1 La3 107.55(19) . 17_667 ?
O6 La1 La3 74.49(12) . 17_667 ?
O28 La1 La3 71.71(11) 17_667 17_667 ?
O29 La1 La3 35.75(12) . 17_667 ?
O9 La1 La3 104.42(12) . 17_667 ?
N8 La1 La3 57.90(13) . 17_667 ?
O39 La1 La3 143.28(12) . . ?
O43 La1 La3 96.71(12) . . ?
O42 La1 La3 36.42(11) . . ?
O27 La1 La3 34.52(11) . . ?
O36 La1 La3 60.93(15) . . ?
O6 La1 La3 92.48(12) . . ?
O28 La1 La3 127.69(11) 17_667 . ?
O29 La1 La3 82.87(11) . . ?
O9 La1 La3 129.13(12) . . ?
N8 La1 La3 58.53(13) . . ?
La3 La1 La3 115.462(12) 17_667 . ?
O41 La2 O40 120.58(18) . . ?
O41 La2 O43 119.47(18) . . ?
O40 La2 O43 118.02(18) . . ?
O41 La2 O37 69.0(2) . 9_456 ?
O40 La2 O37 71.5(2) . 9_456 ?
O43 La2 O37 146.9(2) . 9_456 ?
O41 La2 O18 65.61(17) . . ?
O40 La2 O18 69.37(17) . . ?
O43 La2 O18 126.59(18) . . ?
O37 La2 O18 86.4(2) 9_456 . ?
O41 La2 O48 156.1(4) . . ?
O40 La2 O48 67.8(2) . . ?
O43 La2 O48 63.9(3) . . ?
O37 La2 O48 95.7(4) 9_456 . ?
O18 La2 O48 133.8(3) . . ?
O41 La2 O38 104.6(3) . 9_456 ?
O40 La2 O38 71.9(3) . 9_456 ?
O43 La2 O38 106.3(2) . 9_456 ?
O37 La2 O38 43.7(3) 9_456 9_456 ?
O18 La2 O38 124.4(2) . 9_456 ?
O48 La2 O38 54.6(4) . 9_456 ?
O41 La2 O12 70.13(16) . . ?
O40 La2 O12 126.24(17) . . ?
O43 La2 O12 64.29(17) . . ?
O37 La2 O12 138.6(2) 9_456 . ?
O18 La2 O12 70.49(16) . . ?
O48 La2 O12 125.3(3) . . ?
O38 La2 O12 161.6(3) 9_456 . ?
O41 La2 O13 125.51(18) . . ?
O40 La2 O13 63.72(18) . . ?
O43 La2 O13 70.43(18) . . ?
O37 La2 O13 133.72(19) 9_456 . ?
O18 La2 O13 67.85(19) . . ?
O48 La2 O13 78.4(4) . . ?
O38 La2 O13 124.7(3) 9_456 . ?
O12 La2 O13 68.88(16) . . ?
O41 La2 O28 67.42(16) . 17_667 ?
O40 La2 O28 146.79(16) . 17_667 ?
O43 La2 O28 72.41(16) . 17_667 ?
O37 La2 O28 83.99(18) 9_456 17_667 ?
O18 La2 O28 132.40(16) . 17_667 ?
O48 La2 O28 93.6(3) . 17_667 ?
O38 La2 O28 74.9(3) 9_456 17_667 ?
O12 La2 O28 86.95(16) . 17_667 ?
O13 La2 O28 141.69(17) . 17_667 ?
O41 La2 Ni2 32.72(12) . . ?
O40 La2 Ni2 99.57(12) . . ?
O43 La2 Ni2 124.06(13) . . ?
O37 La2 Ni2 81.4(2) 9_456 . ?
O18 La2 Ni2 33.94(12) . . ?
O48 La2 Ni2 167.2(2) . . ?
O38 La2 Ni2 124.8(2) 9_456 . ?
O12 La2 Ni2 60.12(11) . . ?
O13 La2 Ni2 94.64(14) . . ?
O28 La2 Ni2 98.47(11) 17_667 . ?
O41 La2 La4 142.44(12) . . ?
O40 La2 La4 34.41(12) . . ?
O43 La2 La4 96.17(13) . . ?
O37 La2 La4 74.6(2) 9_456 . ?
O18 La2 La4 103.74(12) . . ?
O48 La2 La4 35.13(17) . . ?
O38 La2 La4 49.8(2) 9_456 . ?
O12 La2 La4 143.10(11) . . ?
O13 La2 La4 75.21(12) . . ?
O28 La2 La4 118.12(11) 17_667 . ?
Ni2 La2 La4 132.86(2) . . ?
O39 La3 O29 72.46(18) 21_676 21_676 ?
O39 La3 O27 66.52(17) 21_676 . ?
O29 La3 O27 77.03(17) 21_676 . ?
O39 La3 O41 117.40(17) 21_676 5_465 ?
O29 La3 O41 70.96(17) 21_676 5_465 ?
O27 La3 O41 143.67(17) . 5_465 ?
O39 La3 O19 132.53(18) 21_676 5_465 ?
O29 La3 O19 135.79(17) 21_676 5_465 ?
O27 La3 O19 141.88(17) . 5_465 ?
O41 La3 O19 65.03(17) 5_465 5_465 ?
O39 La3 O4 72.11(17) 21_676 . ?
O29 La3 O4 144.11(18) 21_676 . ?
O27 La3 O4 93.99(18) . . ?
O41 La3 O4 122.08(17) 5_465 . ?
O19 La3 O4 69.47(17) 5_465 . ?
O39 La3 O42 114.95(16) 21_676 . ?
O29 La3 O42 133.78(17) 21_676 . ?
O27 La3 O42 66.91(16) . . ?
O41 La3 O42 127.15(16) 5_465 . ?
O19 La3 O42 75.03(16) 5_465 . ?
O4 La3 O42 68.62(16) . . ?
O39 La3 O8 66.22(17) 21_676 21_676 ?
O29 La3 O8 93.88(18) 21_676 21_676 ?
O27 La3 O8 132.43(17) . 21_676 ?
O41 La3 O8 67.64(17) 5_465 21_676 ?
O19 La3 O8 73.50(17) 5_465 21_676 ?
O4 La3 O8 66.53(17) . 21_676 ?
O42 La3 O8 131.74(16) . 21_676 ?
O39 La3 O37 142.9(2) 21_676 . ?
O29 La3 O37 75.6(2) 21_676 . ?
O27 La3 O37 88.42(18) . . ?
O41 La3 O37 67.58(19) 5_465 . ?
O19 La3 O37 84.1(2) 5_465 . ?
O4 La3 O37 139.6(2) . . ?
O42 La3 O37 75.47(19) . . ?
O8 La3 O37 135.00(18) 21_676 . ?
O39 La3 Ni3 98.30(12) 21_676 . ?
O29 La3 Ni3 161.38(12) 21_676 . ?
O27 La3 Ni3 84.48(12) . . ?
O41 La3 Ni3 127.28(12) 5_465 . ?
O19 La3 Ni3 62.26(12) 5_465 . ?
O4 La3 Ni3 34.32(12) . . ?
O42 La3 Ni3 35.24(11) . . ?
O8 La3 Ni3 97.05(12) 21_676 . ?
O37 La3 Ni3 106.33(17) . . ?
O39 La3 Ni4 32.98(13) 21_676 . ?
O29 La3 Ni4 87.99(13) 21_676 . ?
O27 La3 Ni4 98.09(12) . . ?
O41 La3 Ni4 97.52(13) 5_465 . ?
O19 La3 Ni4 101.27(13) 5_465 . ?
O4 La3 Ni4 58.54(12) . . ?
O42 La3 Ni4 123.90(11) . . ?
O8 La3 Ni4 34.42(12) 21_676 . ?
O37 La3 Ni4 160.59(16) . . ?
Ni3 La3 Ni4 92.54(3) . . ?
O39 La3 Ni2 124.62(12) 21_676 5_465 ?
O29 La3 Ni2 103.40(12) 21_676 5_465 ?
O27 La3 Ni2 168.66(12) . 5_465 ?
O41 La3 Ni2 32.94(11) 5_465 5_465 ?
O19 La3 Ni2 33.77(12) 5_465 5_465 ?
O4 La3 Ni2 92.00(13) . 5_465 ?
O42 La3 Ni2 106.61(11) . 5_465 ?
O8 La3 Ni2 58.90(12) 21_676 5_465 ?
O37 La3 Ni2 80.79(14) . 5_465 ?
Ni3 La3 Ni2 95.15(2) . 5_465 ?
Ni4 La3 Ni2 93.25(3) . 5_465 ?
O48 La4 O48 95.3(5) 5_465 9_456 ?
O48 La4 O48 95.3(5) 5_465 . ?
O48 La4 O48 95.3(5) 9_456 . ?
O48 La4 O40 66.0(2) 5_465 9_456 ?
O48 La4 O40 69.4(3) 9_456 9_456 ?
O48 La4 O40 153.5(4) . 9_456 ?
O48 La4 O40 69.4(3) 5_465 5_465 ?
O48 La4 O40 153.5(4) 9_456 5_465 ?
O48 La4 O40 66.0(2) . 5_465 ?
O40 La4 O40 119.26(4) 9_456 5_465 ?
O48 La4 O40 153.5(4) 5_465 . ?
O48 La4 O40 66.0(2) 9_456 . ?
O48 La4 O40 69.4(3) . . ?
O40 La4 O40 119.26(4) 9_456 . ?
O40 La4 O40 119.25(4) 5_465 . ?
O48 La4 O16 135.6(3) 5_465 . ?
O48 La4 O16 129.0(3) 9_456 . ?
O48 La4 O16 81.1(4) . . ?
O40 La4 O16 125.44(18) 9_456 . ?
O40 La4 O16 68.90(17) 5_465 . ?
O40 La4 O16 65.29(18) . . ?
O48 La4 O16 81.1(4) 5_465 5_465 ?
O48 La4 O16 135.6(4) 9_456 5_465 ?
O48 La4 O16 129.0(3) . 5_465 ?
O40 La4 O16 68.90(17) 9_456 5_465 ?
O40 La4 O16 65.30(18) 5_465 5_465 ?
O40 La4 O16 125.44(18) . 5_465 ?
O16 La4 O16 68.42(19) . 5_465 ?
O48 La4 O16 129.0(3) 5_465 9_456 ?
O48 La4 O16 81.1(4) 9_456 9_456 ?
O48 La4 O16 135.6(3) . 9_456 ?
O40 La4 O16 65.30(18) 9_456 9_456 ?
O40 La4 O16 125.44(18) 5_465 9_456 ?
O40 La4 O16 68.90(17) . 9_456 ?
O16 La4 O16 68.42(19) . 9_456 ?
O16 La4 O16 68.42(19) 5_465 9_456 ?
O48 La4 Ni5 168.0(2) 5_465 . ?
O48 La4 Ni5 95.4(2) 9_456 . ?
O48 La4 Ni5 78.3(4) . . ?
O40 La4 Ni5 123.23(14) 9_456 . ?
O40 La4 Ni5 98.64(13) 5_465 . ?
O40 La4 Ni5 32.51(13) . . ?
O16 La4 Ni5 33.80(13) . . ?
O16 La4 Ni5 94.94(12) 5_465 . ?
O16 La4 Ni5 58.28(13) 9_456 . ?
O48 La4 Ni5 95.4(2) 5_465 9_456 ?
O48 La4 Ni5 78.3(4) 9_456 9_456 ?
O48 La4 Ni5 168.0(2) . 9_456 ?
O40 La4 Ni5 32.51(13) 9_456 9_456 ?
O40 La4 Ni5 123.23(14) 5_465 9_456 ?
O40 La4 Ni5 98.64(13) . 9_456 ?
O16 La4 Ni5 94.94(12) . 9_456 ?
O16 La4 Ni5 58.29(13) 5_465 9_456 ?
O16 La4 Ni5 33.80(13) 9_456 9_456 ?
Ni5 La4 Ni5 92.00(3) . 9_456 ?
O48 La4 Ni5 78.3(4) 5_465 5_465 ?
O48 La4 Ni5 168.0(2) 9_456 5_465 ?
O48 La4 Ni5 95.4(2) . 5_465 ?
O40 La4 Ni5 98.64(13) 9_456 5_465 ?
O40 La4 Ni5 32.51(13) 5_465 5_465 ?
O40 La4 Ni5 123.23(14) . 5_465 ?
O16 La4 Ni5 58.29(13) . 5_465 ?
O16 La4 Ni5 33.80(13) 5_465 5_465 ?
O16 La4 Ni5 94.94(12) 9_456 5_465 ?
Ni5 La4 Ni5 92.00(3) . 5_465 ?
Ni5 La4 Ni5 92.00(3) 9_456 5_465 ?
O25 La5 O25 109.31(14) . 11_376 ?
O25 La5 O25 109.31(14) . 8_667 ?
O25 La5 O25 109.30(14) 11_376 8_667 ?
O25 La5 O26 63.75(19) . 11_376 ?
O25 La5 O26 48.44(18) 11_376 11_376 ?
O25 La5 O26 109.4(2) 8_667 11_376 ?
O25 La5 O26 109.4(2) . 8_667 ?
O25 La5 O26 63.75(19) 11_376 8_667 ?
O25 La5 O26 48.44(18) 8_667 8_667 ?
O26 La5 O26 67.4(2) 11_376 8_667 ?
O25 La5 O26 48.44(18) . . ?
O25 La5 O26 109.4(2) 11_376 . ?
O25 La5 O26 63.75(19) 8_667 . ?
O26 La5 O26 67.4(2) 11_376 . ?
O26 La5 O26 67.4(2) 8_667 . ?
O25 La5 O22 69.56(19) . 11_376 ?
O25 La5 O22 69.9(2) 11_376 11_376 ?
O25 La5 O22 178.1(2) 8_667 11_376 ?
O26 La5 O22 68.8(2) 11_376 11_376 ?
O26 La5 O22 130.22(19) 8_667 11_376 ?
O26 La5 O22 114.71(18) . 11_376 ?
O25 La5 O22 69.94(19) . . ?
O25 La5 O22 178.1(2) 11_376 . ?
O25 La5 O22 69.56(19) 8_667 . ?
O26 La5 O22 130.22(19) 11_376 . ?
O26 La5 O22 114.71(18) 8_667 . ?
O26 La5 O22 68.8(2) . . ?
O22 La5 O22 111.15(13) 11_376 . ?
O25 La5 O22 178.1(2) . 8_667 ?
O25 La5 O22 69.56(19) 11_376 8_667 ?
O25 La5 O22 69.9(2) 8_667 8_667 ?
O26 La5 O22 114.71(18) 11_376 8_667 ?
O26 La5 O22 68.8(2) 8_667 8_667 ?
O26 La5 O22 130.22(19) . 8_667 ?
O22 La5 O22 111.14(13) 11_376 8_667 ?
O22 La5 O22 111.14(13) . 8_667 ?
O25 La5 O23 113.82(19) . 11_376 ?
O25 La5 O23 71.3(2) 11_376 11_376 ?
O25 La5 O23 133.76(19) 8_667 11_376 ?
O26 La5 O23 104.0(2) 11_376 11_376 ?
O26 La5 O23 125.3(2) 8_667 11_376 ?
O26 La5 O23 162.04(18) . 11_376 ?
O22 La5 O23 47.87(19) 11_376 11_376 ?
O22 La5 O23 110.6(2) . 11_376 ?
O22 La5 O23 67.4(2) 8_667 11_376 ?
O25 La5 O23 71.31(19) . . ?
O25 La5 O23 133.77(19) 11_376 . ?
O25 La5 O23 113.82(19) 8_667 . ?
O26 La5 O23 125.3(2) 11_376 . ?
O26 La5 O23 162.04(18) 8_667 . ?
O26 La5 O23 104.0(2) . . ?
O22 La5 O23 67.4(2) 11_376 . ?
O22 La5 O23 47.87(19) . . ?
O22 La5 O23 110.6(2) 8_667 . ?
O23 La5 O23 67.2(2) 11_376 . ?
O25 La5 O23 133.77(19) . 8_667 ?
O25 La5 O23 113.82(19) 11_376 8_667 ?
O25 La5 O23 71.30(19) 8_667 8_667 ?
O26 La5 O23 162.04(18) 11_376 8_667 ?
O26 La5 O23 104.0(2) 8_667 8_667 ?
O26 La5 O23 125.3(2) . 8_667 ?
O22 La5 O23 110.6(2) 11_376 8_667 ?
O22 La5 O23 67.4(2) . 8_667 ?
O22 La5 O23 47.87(19) 8_667 8_667 ?
O23 La5 O23 67.2(2) 11_376 8_667 ?
O23 La5 O23 67.2(2) . 8_667 ?
O9 Ni1 O14 171.3(2) . . ?
O9 Ni1 O43 83.3(2) . . ?
O14 Ni1 O43 102.8(2) . . ?
O9 Ni1 O12 94.1(2) . . ?
O14 Ni1 O12 92.6(2) . . ?
O43 Ni1 O12 84.3(2) . . ?
O9 Ni1 O44 91.3(3) . . ?
O14 Ni1 O44 81.8(3) . . ?
O43 Ni1 O44 97.7(3) . . ?
O12 Ni1 O44 174.4(2) . . ?
O9 Ni1 N3 84.0(2) . . ?
O14 Ni1 N3 91.6(3) . . ?
O43 Ni1 N3 160.3(2) . . ?
O12 Ni1 N3 81.7(2) . . ?
O44 Ni1 N3 97.6(3) . . ?
O41 Ni2 O18 84.9(2) . . ?
O41 Ni2 O7 97.8(2) . 17_667 ?
O18 Ni2 O7 173.4(2) . 17_667 ?
O41 Ni2 O19 83.9(2) . . ?
O18 Ni2 O19 90.6(2) . . ?
O7 Ni2 O19 95.7(2) 17_667 . ?
O41 Ni2 O11 99.5(2) . . ?
O18 Ni2 O11 89.8(2) . . ?
O7 Ni2 O11 83.8(2) 17_667 . ?
O19 Ni2 O11 176.7(2) . . ?
O41 Ni2 N5 160.2(2) . . ?
O18 Ni2 N5 81.9(2) . . ?
O7 Ni2 N5 97.0(2) 17_667 . ?
O19 Ni2 N5 81.7(2) . . ?
O11 Ni2 N5 95.1(2) . . ?
O41 Ni2 Na 120.43(17) . . ?
O18 Ni2 Na 128.01(17) . . ?
O7 Ni2 Na 45.55(16) 17_667 . ?
O19 Ni2 Na 133.13(17) . . ?
O11 Ni2 Na 44.89(16) . . ?
N5 Ni2 Na 79.3(2) . . ?
O41 Ni2 La2 41.15(16) . . ?
O18 Ni2 La2 45.19(15) . . ?
O7 Ni2 La2 135.75(15) 17_667 . ?
O19 Ni2 La2 94.88(16) . . ?
O11 Ni2 La2 87.72(14) . . ?
N5 Ni2 La2 127.01(19) . . ?
Na Ni2 La2 130.43(7) . . ?
O41 Ni2 La3 42.93(15) . 9_456 ?
O18 Ni2 La3 98.05(15) . 9_456 ?
O7 Ni2 La3 87.92(15) 17_667 9_456 ?
O19 Ni2 La3 43.30(15) . 9_456 ?
O11 Ni2 La3 139.84(16) . 9_456 ?
N5 Ni2 La3 124.96(18) . 9_456 ?
Na Ni2 La3 132.14(8) . 9_456 ?
La2 Ni2 La3 71.38(2) . 9_456 ?
O4 Ni3 O2 162.5(2) . . ?
O4 Ni3 O42 90.6(2) . . ?
O2 Ni3 O42 105.6(2) . . ?
O4 Ni3 N1 81.6(2) . . ?
O2 Ni3 N1 82.2(3) . . ?
O42 Ni3 N1 172.2(2) . . ?
O4 Ni3 O20 95.2(2) . 5_465 ?
O2 Ni3 O20 90.8(2) . 5_465 ?
O42 Ni3 O20 91.3(2) . 5_465 ?
N1 Ni3 O20 88.7(2) . 5_465 ?
O4 Ni3 O5 85.3(2) . . ?
O2 Ni3 O5 86.4(2) . . ?
O42 Ni3 O5 97.0(2) . . ?
N1 Ni3 O5 83.2(2) . . ?
O20 Ni3 O5 171.8(2) 5_465 . ?
O4 Ni3 La3 45.55(15) . . ?
O2 Ni3 La3 151.64(18) . . ?
O42 Ni3 La3 46.49(14) . . ?
N1 Ni3 La3 125.78(18) . . ?
O20 Ni3 La3 85.56(15) 5_465 . ?
O5 Ni3 La3 100.51(17) . . ?
O39 Ni4 O10 98.3(2) 21_676 21_676 ?
O39 Ni4 O3 100.6(2) 21_676 . ?
O10 Ni4 O3 84.5(2) 21_676 . ?
O39 Ni4 O8 86.3(2) 21_676 21_676 ?
O10 Ni4 O8 174.8(2) 21_676 21_676 ?
O3 Ni4 O8 92.3(2) . 21_676 ?
O39 Ni4 O6 81.8(2) 21_676 21_676 ?
O10 Ni4 O6 94.3(2) 21_676 21_676 ?
O3 Ni4 O6 177.5(2) . 21_676 ?
O8 Ni4 O6 88.7(2) 21_676 21_676 ?
O39 Ni4 N2 160.7(3) 21_676 21_676 ?
O10 Ni4 N2 94.2(2) 21_676 21_676 ?
O3 Ni4 N2 95.2(2) . 21_676 ?
O8 Ni4 N2 82.0(2) 21_676 21_676 ?
O6 Ni4 N2 82.7(2) 21_676 21_676 ?
O39 Ni4 La3 42.27(15) 21_676 . ?
O10 Ni4 La3 138.05(16) 21_676 . ?
O3 Ni4 La3 89.43(15) . . ?
O8 Ni4 La3 45.72(15) 21_676 . ?
O6 Ni4 La3 92.89(15) 21_676 . ?
N2 Ni4 La3 127.71(18) 21_676 . ?
O40 Ni5 O17 99.9(2) . . ?
O40 Ni5 O15 100.3(3) . 9_456 ?
O17 Ni5 O15 87.9(3) . 9_456 ?
O40 Ni5 O13 84.8(2) . . ?
O17 Ni5 O13 90.3(3) . . ?
O15 Ni5 O13 174.8(3) 9_456 . ?
O40 Ni5 O16 86.3(2) . . ?
O17 Ni5 O16 173.8(3) . . ?
O15 Ni5 O16 90.7(2) 9_456 . ?
O13 Ni5 O16 90.6(2) . . ?
O40 Ni5 N4 162.8(3) . . ?
O17 Ni5 N4 92.3(3) . . ?
O15 Ni5 N4 92.2(3) 9_456 . ?
O13 Ni5 N4 83.0(3) . . ?
O16 Ni5 N4 81.7(3) . . ?
O40 Ni5 La4 42.23(15) . . ?
O17 Ni5 La4 140.4(2) . . ?
O15 Ni5 La4 88.82(17) 9_456 . ?
O13 Ni5 La4 95.66(16) . . ?
O16 Ni5 La4 45.51(16) . . ?
N4 Ni5 La4 127.2(2) . . ?
O47 Na O11 106.6(3) . . ?
O47 Na O7 166.0(3) . 17_667 ?
O11 Na O7 68.8(2) . 17_667 ?
O47 Na O46 89.7(3) . . ?
O11 Na O46 92.1(2) . . ?
O7 Na O46 103.5(3) 17_667 . ?
O47 Na O31 85.1(4) . . ?
O11 Na O31 77.1(3) . . ?
O7 Na O31 81.0(3) 17_667 . ?
O46 Na O31 166.0(4) . . ?
O47 Na O22 96.8(3) . . ?
O11 Na O22 153.8(3) . . ?
O7 Na O22 91.1(2) 17_667 . ?
O46 Na O22 76.0(2) . . ?
O31 Na O22 117.5(4) . . ?
O47 Na O21 79.9(3) . . ?
O11 Na O21 148.7(2) . . ?
O7 Na O21 97.4(2) 17_667 . ?
O46 Na O21 118.8(2) . . ?
O31 Na O21 73.0(3) . . ?
O22 Na O21 46.51(19) . . ?
O47 Na Ni2 142.8(3) . . ?
O11 Na Ni2 37.11(14) . . ?
O7 Na Ni2 36.68(14) 17_667 . ?
O46 Na Ni2 85.5(2) . . ?
O31 Na Ni2 90.9(2) . . ?
O22 Na Ni2 117.5(2) . . ?
O21 Na Ni2 133.9(2) . . ?
C1 O2 Ni3 114.0(5) . . ?
C4 O3 Ni4 121.9(5) . . ?
C4 O4 Ni3 114.1(5) . . ?
C4 O4 La3 145.2(5) . . ?
Ni3 O4 La3 100.1(2) . . ?
C5 O5 Ni3 127.1(5) . . ?
C5 O6 Ni4 114.0(5) . 17_667 ?
C5 O6 La1 141.2(5) . . ?
Ni4 O6 La1 103.3(2) 17_667 . ?
C8 O7 Ni2 123.8(5) . 21_676 ?
C8 O7 Na 132.9(5) . 21_676 ?
Ni2 O7 Na 97.8(2) 21_676 21_676 ?
C8 O8 Ni4 116.1(5) . 17_667 ?
C8 O8 La3 142.7(5) . 17_667 ?
Ni4 O8 La3 99.9(2) 17_667 17_667 ?
C9 O9 Ni1 114.7(5) . . ?
C9 O9 La1 140.9(5) . . ?
Ni1 O9 La1 104.3(2) . . ?
C9 O10 Ni4 125.1(6) . 17_667 ?
C12 O11 Ni2 124.2(5) . . ?
C12 O11 Na 133.2(5) . . ?
Ni2 O11 Na 98.0(2) . . ?
C12 O12 Ni1 114.5(5) . . ?
C12 O12 La2 139.3(5) . . ?
Ni1 O12 La2 101.8(2) . . ?
C13 O13 Ni5 114.8(5) . . ?
C13 O13 La2 143.2(5) . . ?
Ni5 O13 La2 101.0(2) . . ?
C13 O14 Ni1 124.3(5) . . ?
C16 O15 Ni5 124.5(5) . 5_465 ?
C16 O16 Ni5 114.1(5) . . ?
C16 O16 La4 142.8(5) . . ?
Ni5 O16 La4 100.7(2) . . ?
C17 O17 Ni5 123.5(5) . . ?
C17 O18 Ni2 114.9(5) . . ?
C17 O18 La2 142.5(5) . . ?
Ni2 O18 La2 100.9(2) . . ?
C20 O19 Ni2 115.9(5) . . ?
C20 O19 La3 140.4(5) . 9_456 ?
Ni2 O19 La3 102.9(2) . 9_456 ?
C20 O20 Ni3 125.2(5) . 9_456 ?
O21 N6 O23 122.5(8) . . ?
O21 N6 O22 120.5(7) . . ?
O23 N6 O22 117.0(7) . . ?
N6 O21 Na 87.0(5) . . ?
N6 O22 Na 104.7(5) . . ?
N6 O22 La5 97.4(5) . . ?
Na O22 La5 155.9(3) . . ?
N6 O23 La5 97.6(5) . . ?
O24 N7 O26 121.4(8) . . ?
O24 N7 O25 121.8(8) . . ?
O26 N7 O25 116.9(7) . . ?
O24 N7 La5 175.2(6) . . ?
O26 N7 La5 59.2(4) . . ?
O25 N7 La5 58.0(4) . . ?
N7 O25 La5 97.6(4) . . ?
N7 O26 La5 96.6(5) . . ?
O28 N8 O29 123.6(6) . . ?
O28 N8 O27 122.6(6) . . ?
O29 N8 O27 113.7(6) . . ?
O28 N8 La1 177.8(5) . . ?
O29 N8 La1 58.4(4) . . ?
O27 N8 La1 55.4(3) . . ?
N8 O27 La3 144.7(5) . . ?
N8 O27 La1 99.8(4) . . ?
La3 O27 La1 110.07(19) . . ?
N8 O28 La1 130.4(4) . 21_676 ?
N8 O28 La2 128.9(4) . 21_676 ?
La1 O28 La2 100.67(16) 21_676 21_676 ?
N8 O29 La3 140.7(5) . 17_667 ?
N8 O29 La1 97.0(4) . . ?
La3 O29 La1 106.23(19) 17_667 . ?
O32 N9 O31 115.2(12) . . ?
O32 N9 O30 117.7(13) . . ?
O31 N9 O30 126.2(11) . . ?
N9 O31 Na 125.9(8) . . ?
O34 C21 O33 101.6(15) . . ?
O34 C21 O35 135.3(15) . . ?
O33 C21 O35 123.2(13) . . ?
O37 C22 O36 127.0(10) . . ?
O37 C22 O38 99.7(10) . . ?
O36 C22 O38 125.4(10) . . ?
O37 C22 La6 138.3(12) . 9_456 ?
O36 C22 La6 73.9(10) . 9_456 ?
O38 C22 La6 51.6(9) . 9_456 ?
O37 C22 La6 141.0(12) . 5_465 ?
O36 C22 La6 72.1(7) . 5_465 ?
O38 C22 La6 53.4(7) . 5_465 ?
La6 C22 La6 2.6(8) 9_456 5_465 ?
O37 C22 La6 139.4(13) . . ?
O36 C22 La6 74.2(9) . . ?
O38 C22 La6 51.3(8) . . ?
La6 C22 La6 1.6(6) 9_456 . ?
La6 C22 La6 2.1(8) 5_465 . ?
C22 O36 La1 133.8(7) . . ?
C22 O36 La6 83.3(7) . 5_465 ?
La1 O36 La6 142.9(4) . 5_465 ?
C22 O36 La6 81.3(8) . 9_456 ?
La1 O36 La6 144.8(5) . 9_456 ?
La6 O36 La6 2.8(8) 5_465 9_456 ?
C22 O36 La6 82.0(9) . . ?
La1 O36 La6 144.2(7) . . ?
La6 O36 La6 1.4(12) 5_465 . ?
La6 O36 La6 1.7(12) 9_456 . ?
C22 O37 La2 112.8(8) . 5_465 ?
C22 O37 La3 125.0(7) . . ?
La2 O37 La3 108.2(2) 5_465 . ?
C22 O38 La6 102.1(13) . 9_456 ?
C22 O38 La6 100.4(10) . 5_465 ?
La6 O38 La6 2.9(10) 9_456 5_465 ?
C22 O38 La6 103.6(10) . . ?
La6 O38 La6 2.5(7) 9_456 . ?
La6 O38 La6 3.2(9) 5_465 . ?
C22 O38 La2 103.0(7) . 5_465 ?
La6 O38 La2 144.2(10) 9_456 5_465 ?
La6 O38 La2 147.0(6) 5_465 5_465 ?
La6 O38 La2 144.4(10) . 5_465 ?
Ni4 O39 La1 108.3(2) 17_667 . ?
Ni4 O39 La3 104.8(2) 17_667 17_667 ?
La1 O39 La3 111.0(2) . 17_667 ?
Ni5 O40 La2 107.6(2) . . ?
Ni5 O40 La4 105.3(2) . . ?
La2 O40 La4 111.5(2) . . ?
Ni2 O41 La2 106.1(2) . . ?
Ni2 O41 La3 104.1(2) . 9_456 ?
La2 O41 La3 114.5(2) . 9_456 ?
Ni3 O42 La1 130.6(2) . . ?
Ni3 O42 La3 98.27(19) . . ?
La1 O42 La3 107.78(18) . . ?
Ni1 O43 La1 109.6(2) . . ?
Ni1 O43 La2 105.3(2) . . ?
La1 O43 La2 110.6(2) . . ?
La4 O48 La2 107.7(3) . . ?
C2 N1 C3 116.5(7) . . ?
C2 N1 Ni3 107.9(5) . . ?
C3 N1 Ni3 107.5(5) . . ?
C2 N1 H1A 108.2 . . ?
C3 N1 H1A 108.2 . . ?
Ni3 N1 H1A 108.2 . . ?
C6 N2 C7 113.7(7) . . ?
C6 N2 Ni4 106.4(5) . 17_667 ?
C7 N2 Ni4 108.1(5) . 17_667 ?
C6 N2 H2C 109.5 . . ?
C7 N2 H2C 109.5 . . ?
Ni4 N2 H2C 109.5 17_667 . ?
C10 N3 C11 115.1(8) . . ?
C10 N3 Ni1 107.4(5) . . ?
C11 N3 Ni1 106.9(5) . . ?
C10 N3 H3C 109.1 . . ?
C11 N3 H3C 109.1 . . ?
Ni1 N3 H3C 109.1 . . ?
C14 N4 C15 114.1(9) . . ?
C14 N4 Ni5 108.2(5) . . ?
C15 N4 Ni5 106.2(5) . . ?
C14 N4 H4A 109.4 . . ?
C15 N4 H4A 109.4 . . ?
Ni5 N4 H4A 109.4 . . ?
C18 N5 C19 114.2(7) . . ?
C18 N5 Ni2 106.0(5) . . ?
C19 N5 Ni2 108.8(5) . . ?
C18 N5 H5A 109.2 . . ?
C19 N5 H5A 109.2 . . ?
Ni2 N5 H5A 109.2 . . ?
O1 C1 O2 122.9(8) . . ?
O1 C1 C2 118.3(8) . . ?
O2 C1 C2 118.7(8) . . ?
N1 C2 C1 111.2(7) . . ?
N1 C2 H2A 109.4 . . ?
C1 C2 H2A 109.4 . . ?
N1 C2 H2B 109.4 . . ?
C1 C2 H2B 109.4 . . ?
H2A C2 H2B 108.0 . . ?
N1 C3 C4 110.5(6) . . ?
N1 C3 H3A 109.5 . . ?
C4 C3 H3A 109.5 . . ?
N1 C3 H3B 109.5 . . ?
C4 C3 H3B 109.5 . . ?
H3A C3 H3B 108.1 . . ?
O3 C4 O4 124.9(8) . . ?
O3 C4 C3 117.4(7) . . ?
O4 C4 C3 117.6(7) . . ?
O5 C5 O6 125.1(7) . . ?
O5 C5 C6 117.3(7) . . ?
O6 C5 C6 117.6(7) . . ?
N2 C6 C5 112.5(7) . . ?
N2 C6 H6A 109.1 . . ?
C5 C6 H6A 109.1 . . ?
N2 C6 H6B 109.1 . . ?
C5 C6 H6B 109.1 . . ?
H6A C6 H6B 107.8 . . ?
N2 C7 C8 114.7(7) . . ?
N2 C7 H7A 108.6 . . ?
C8 C7 H7A 108.6 . . ?
N2 C7 H7B 108.6 . . ?
C8 C7 H7B 108.6 . . ?
H7A C7 H7B 107.6 . . ?
O7 C8 O8 125.2(8) . . ?
O7 C8 C7 118.0(7) . . ?
O8 C8 C7 116.8(7) . . ?
O10 C9 O9 126.0(8) . . ?
O10 C9 C10 116.5(8) . . ?
O9 C9 C10 117.5(7) . . ?
N3 C10 C9 115.7(7) . . ?
N3 C10 H10A 108.4 . . ?
C9 C10 H10A 108.4 . . ?
N3 C10 H10B 108.4 . . ?
C9 C10 H10B 108.4 . . ?
H10A C10 H10B 107.4 . . ?
N3 C11 C12 113.2(7) . . ?
N3 C11 H11A 108.9 . . ?
C12 C11 H11A 108.9 . . ?
N3 C11 H11B 108.9 . . ?
C12 C11 H11B 108.9 . . ?
H11A C11 H11B 107.8 . . ?
O11 C12 O12 125.9(7) . . ?
O11 C12 C11 116.5(7) . . ?
O12 C12 C11 117.6(7) . . ?
O14 C13 O13 124.7(8) . . ?
O14 C13 C14 117.0(8) . . ?
O13 C13 C14 118.3(8) . . ?
N4 C14 C13 114.6(8) . . ?
N4 C14 H14A 108.6 . . ?
C13 C14 H14A 108.6 . . ?
N4 C14 H14B 108.6 . . ?
C13 C14 H14B 108.6 . . ?
H14A C14 H14B 107.6 . . ?
N4 C15 C16 112.0(7) . . ?
N4 C15 H15A 109.2 . . ?
C16 C15 H15A 109.2 . . ?
N4 C15 H15B 109.2 . . ?
C16 C15 H15B 109.2 . . ?
H15A C15 H15B 107.9 . . ?
O15 C16 O16 123.8(7) . . ?
O15 C16 C15 117.7(7) . . ?
O16 C16 C15 118.4(8) . . ?
O17 C17 O18 126.8(7) . . ?
O17 C17 C18 115.8(7) . . ?
O18 C17 C18 117.3(7) . . ?
N5 C18 C17 112.1(7) . . ?
N5 C18 H18A 109.2 . . ?
C17 C18 H18A 109.2 . . ?
N5 C18 H18B 109.2 . . ?
C17 C18 H18B 109.2 . . ?
H18A C18 H18B 107.9 . . ?
N5 C19 C20 113.3(7) . . ?
N5 C19 H19A 108.9 . . ?
C20 C19 H19A 108.9 . . ?
N5 C19 H19B 108.9 . . ?
C20 C19 H19B 108.9 . . ?
H19A C19 H19B 107.7 . . ?
O20 C20 O19 123.3(7) . . ?
O20 C20 C19 117.3(7) . . ?
O19 C20 C19 119.3(7) . . ?
La6 O45 La6 3.9(12) . 9_456 ?
La6 O45 La6 2.1(9) . 5_465 ?
La6 O45 La6 3.2(13) 9_456 5_465 ?
La6 O45 La6 76.5(7) . 17_667 ?
La6 O45 La6 75.8(11) 9_456 17_667 ?
La6 O45 La6 74.6(4) 5_465 17_667 ?
La6 O45 La6 74.9(13) . 21_676 ?
La6 O45 La6 74.4(4) 9_456 21_676 ?
La6 O45 La6 73.0(10) 5_465 21_676 ?
La6 O45 La6 2.9(9) 17_667 21_676 ?
La6 O45 La6 74.3(4) . 13_577 ?
La6 O45 La6 73.5(12) 9_456 13_577 ?
La6 O45 La6 72.3(7) 5_465 13_577 ?
La6 O45 La6 2.3(7) 17_667 13_577 ?
La6 O45 La6 3.1(9) 21_676 13_577 ?
O45 La6 O45 99.3(9) . 5_465 ?
O45 La6 O45 96.7(14) . 9_456 ?
O45 La6 O45 95.5(10) 5_465 9_456 ?
O45 La6 O38 82.2(11) . 5_465 ?
O45 La6 O38 117.4(15) 5_465 5_465 ?
O45 La6 O38 146.9(19) 9_456 5_465 ?
O45 La6 O45 50.1(4) . 21_676 ?
O45 La6 O45 49.8(6) 5_465 21_676 ?
O45 La6 O45 105.4(4) 9_456 21_676 ?
O38 La6 O45 99.1(9) 5_465 21_676 ?
O45 La6 O38 151.7(11) . 9_456 ?
O45 La6 O38 79.8(16) 5_465 9_456 ?
O45 La6 O38 111.6(12) 9_456 9_456 ?
O38 La6 O38 73.5(6) 5_465 9_456 ?
O45 La6 O38 119.3(17) 21_676 9_456 ?
O45 La6 O38 115(2) . . ?
O45 La6 O38 145.5(17) 5_465 . ?
O45 La6 O38 77.7(10) 9_456 . ?
O38 La6 O38 73.0(7) 5_465 . ?
O45 La6 O38 164.6(19) 21_676 . ?
O38 La6 O38 71.9(5) 9_456 . ?
O45 La6 O45 48.9(8) . 17_667 ?
O45 La6 O45 105.6(4) 5_465 17_667 ?
O45 La6 O45 48.1(7) 9_456 17_667 ?
O38 La6 O45 119.2(17) 5_465 17_667 ?
O45 La6 O45 77.3(7) 21_676 17_667 ?
O38 La6 O45 158.8(11) 9_456 17_667 ?
O38 La6 O45 94.8(15) . 17_667 ?
O45 La6 O45 105.7(4) . 13_577 ?
O45 La6 O45 48.1(6) 5_465 13_577 ?
O45 La6 O45 47.6(4) 9_456 13_577 ?
O38 La6 O45 164(2) 5_465 13_577 ?
O45 La6 O45 76.7(8) 21_676 13_577 ?
O38 La6 O45 94.7(14) 9_456 13_577 ?
O38 La6 O45 114.5(9) . 13_577 ?
O45 La6 O45 75.5(6) 17_667 13_577 ?
O45 La6 O36 106.1(10) . 9_456 ?
O45 La6 O36 53.3(10) 5_465 9_456 ?
O45 La6 O36 143.4(18) 9_456 9_456 ?
O38 La6 O36 66.1(7) 5_465 9_456 ?
O45 La6 O36 70.7(9) 21_676 9_456 ?
O38 La6 O36 50.8(8) 9_456 9_456 ?
O38 La6 O36 115.9(6) . 9_456 ?
O45 La6 O36 148.0(8) 17_667 9_456 ?
O45 La6 O36 97.9(15) 13_577 9_456 ?
O45 La6 O36 53.1(10) . 5_465 ?
O45 La6 O36 148.4(10) 5_465 5_465 ?
O45 La6 O36 102.3(17) 9_456 5_465 ?
O38 La6 O36 51.0(7) 5_465 5_465 ?
O45 La6 O36 99.9(11) 21_676 5_465 ?
O38 La6 O36 116.4(5) 9_456 5_465 ?
O38 La6 O36 64.9(9) . 5_465 ?
O45 La6 O36 69.6(11) 17_667 5_465 ?
O45 La6 O36 144.8(14) 13_577 5_465 ?
O36 La6 O36 114.3(6) 9_456 5_465 ?
O45 La6 C22 64.8(10) . 5_465 ?
O45 La6 C22 136.5(12) 5_465 5_465 ?
O45 La6 C22 125.3(19) 9_456 5_465 ?
O38 La6 C22 26.3(5) 5_465 5_465 ?
O45 La6 C22 99.6(10) 21_676 5_465 ?
O38 La6 C22 96.2(4) 9_456 5_465 ?
O38 La6 C22 67.4(8) . 5_465 ?
O45 La6 C22 93.5(14) 17_667 5_465 ?
O45 La6 C22 168.9(15) 13_577 5_465 ?
O36 La6 C22 90.6(6) 9_456 5_465 ?
O36 La6 C22 24.7(4) 5_465 5_465 ?

loop_
 _geom_torsion_atom_site_label_1
 _geom_torsion_atom_site_label_2
 _geom_torsion_atom_site_label_3
 _geom_torsion_atom_site_label_4
 _geom_torsion
 _geom_torsion_site_symmetry_1
 _geom_torsion_site_symmetry_2
 _geom_torsion_site_symmetry_3
 _geom_torsion_site_symmetry_4
 _geom_torsion_publ_flag
O40 La2 Ni2 O41 133.8(3) . . . . ?
O43 La2 Ni2 O41 -92.7(3) . . . . ?
O37 La2 Ni2 O41 64.3(3) 9_456 . . . ?
O18 La2 Ni2 O41 160.8(3) . . . . ?
O48 La2 Ni2 O41 141.7(15) . . . . ?
O38 La2 Ni2 O41 59.2(4) 9_456 . . . ?
O12 La2 Ni2 O41 -99.7(3) . . . . ?
O13 La2 Ni2 O41 -162.1(3) . . . . ?
O28 La2 Ni2 O41 -18.2(3) 17_667 . . . ?
La4 La2 Ni2 O41 123.8(2) . . . . ?
O41 La2 Ni2 O18 -160.8(3) . . . . ?
O40 La2 Ni2 O18 -27.0(3) . . . . ?
O43 La2 Ni2 O18 106.5(3) . . . . ?
O37 La2 Ni2 O18 -96.5(3) 9_456 . . . ?
O48 La2 Ni2 O18 -19.1(15) . . . . ?
O38 La2 Ni2 O18 -101.6(4) 9_456 . . . ?
O12 La2 Ni2 O18 99.4(3) . . . . ?
O13 La2 Ni2 O18 37.1(3) . . . . ?
O28 La2 Ni2 O18 -179.0(2) 17_667 . . . ?
La4 La2 Ni2 O18 -37.0(2) . . . . ?
O41 La2 Ni2 O7 28.4(3) . . . 17_667 ?
O40 La2 Ni2 O7 162.2(3) . . . 17_667 ?
O43 La2 Ni2 O7 -64.2(3) . . . 17_667 ?
O37 La2 Ni2 O7 92.8(3) 9_456 . . 17_667 ?
O18 La2 Ni2 O7 -170.7(3) . . . 17_667 ?
O48 La2 Ni2 O7 170.2(15) . . . 17_667 ?
O38 La2 Ni2 O7 87.6(4) 9_456 . . 17_667 ?
O12 La2 Ni2 O7 -71.3(2) . . . 17_667 ?
O13 La2 Ni2 O7 -133.7(3) . . . 17_667 ?
O28 La2 Ni2 O7 10.2(2) 17_667 . . 17_667 ?
La4 La2 Ni2 O7 152.2(2) . . . 17_667 ?
O41 La2 Ni2 O19 -74.9(3) . . . . ?
O40 La2 Ni2 O19 58.9(2) . . . . ?
O43 La2 Ni2 O19 -167.5(2) . . . . ?
O37 La2 Ni2 O19 -10.5(2) 9_456 . . . ?
O18 La2 Ni2 O19 86.0(3) . . . . ?
O48 La2 Ni2 O19 66.9(15) . . . . ?
O38 La2 Ni2 O19 -15.7(3) 9_456 . . . ?
O12 La2 Ni2 O19 -174.6(2) . . . . ?
O13 La2 Ni2 O19 123.0(2) . . . . ?
O28 La2 Ni2 O19 -93.08(19) 17_667 . . . ?
La4 La2 Ni2 O19 48.94(16) . . . . ?
O41 La2 Ni2 O11 107.2(3) . . . . ?
O40 La2 Ni2 O11 -119.0(2) . . . . ?
O43 La2 Ni2 O11 14.5(2) . . . . ?
O37 La2 Ni2 O11 171.5(2) 9_456 . . . ?
O18 La2 Ni2 O11 -92.0(3) . . . . ?
O48 La2 Ni2 O11 -111.1(15) . . . . ?
O38 La2 Ni2 O11 166.4(3) 9_456 . . . ?
O12 La2 Ni2 O11 7.5(2) . . . . ?
O13 La2 Ni2 O11 -54.9(2) . . . . ?
O28 La2 Ni2 O11 88.97(19) 17_667 . . . ?
La4 La2 Ni2 O11 -129.02(16) . . . . ?
O41 La2 Ni2 N5 -158.2(3) . . . . ?
O40 La2 Ni2 N5 -24.4(3) . . . . ?
O43 La2 Ni2 N5 109.2(3) . . . . ?
O37 La2 Ni2 N5 -93.8(3) 9_456 . . . ?
O18 La2 Ni2 N5 2.7(3) . . . . ?
O48 La2 Ni2 N5 -16.4(15) . . . . ?
O38 La2 Ni2 N5 -99.0(4) 9_456 . . . ?
O12 La2 Ni2 N5 102.1(3) . . . . ?
O13 La2 Ni2 N5 39.7(3) . . . . ?
O28 La2 Ni2 N5 -176.4(2) 17_667 . . . ?
La4 La2 Ni2 N5 -34.4(2) . . . . ?
O41 La2 Ni2 Na 92.1(2) . . . . ?
O40 La2 Ni2 Na -134.14(17) . . . . ?
O43 La2 Ni2 Na -0.58(18) . . . . ?
O37 La2 Ni2 Na 156.41(18) 9_456 . . . ?
O18 La2 Ni2 Na -107.1(2) . . . . ?
O48 La2 Ni2 Na -126.2(15) . . . . ?
O38 La2 Ni2 Na 151.3(3) 9_456 . . . ?
O12 La2 Ni2 Na -7.66(16) . . . . ?
O13 La2 Ni2 Na -70.04(16) . . . . ?
O28 La2 Ni2 Na 73.86(15) 17_667 . . . ?
La4 La2 Ni2 Na -144.13(10) . . . . ?
O41 La2 Ni2 La3 -38.0(2) . . . 9_456 ?
O40 La2 Ni2 La3 95.84(14) . . . 9_456 ?
O43 La2 Ni2 La3 -130.61(14) . . . 9_456 ?
O37 La2 Ni2 La3 26.39(15) 9_456 . . 9_456 ?
O18 La2 Ni2 La3 122.9(2) . . . 9_456 ?
O48 La2 Ni2 La3 103.8(15) . . . 9_456 ?
O38 La2 Ni2 La3 21.2(3) 9_456 . . 9_456 ?
O12 La2 Ni2 La3 -137.68(13) . . . 9_456 ?
O13 La2 Ni2 La3 159.94(13) . . . 9_456 ?
O28 La2 Ni2 La3 -56.16(11) 17_667 . . 9_456 ?
La4 La2 Ni2 La3 85.85(3) . . . 9_456 ?
O39 La3 Ni3 O4 40.1(3) 21_676 . . . ?
O29 La3 Ni3 O4 98.8(5) 21_676 . . . ?
O27 La3 Ni3 O4 105.4(3) . . . . ?
O41 La3 Ni3 O4 -93.9(3) 5_465 . . . ?
O19 La3 Ni3 O4 -93.9(3) 5_465 . . . ?
O42 La3 Ni3 O4 162.3(3) . . . . ?
O8 La3 Ni3 O4 -26.7(2) 21_676 . . . ?
O37 La3 Ni3 O4 -167.9(3) . . . . ?
Ni4 La3 Ni3 O4 7.5(2) . . . . ?
Ni2 La3 Ni3 O4 -86.0(2) 5_465 . . . ?
O39 La3 Ni3 O2 -134.6(4) 21_676 . . . ?
O29 La3 Ni3 O2 -76.0(6) 21_676 . . . ?
O27 La3 Ni3 O2 -69.4(4) . . . . ?
O41 La3 Ni3 O2 91.3(4) 5_465 . . . ?
O19 La3 Ni3 O2 91.3(4) 5_465 . . . ?
O4 La3 Ni3 O2 -174.8(4) . . . . ?
O42 La3 Ni3 O2 -12.5(4) . . . . ?
O8 La3 Ni3 O2 158.5(4) 21_676 . . . ?
O37 La3 Ni3 O2 17.3(4) . . . . ?
Ni4 La3 Ni3 O2 -167.3(4) . . . . ?
Ni2 La3 Ni3 O2 99.2(4) 5_465 . . . ?
O39 La3 Ni3 O42 -122.2(2) 21_676 . . . ?
O29 La3 Ni3 O42 -63.5(4) 21_676 . . . ?
O27 La3 Ni3 O42 -56.9(2) . . . . ?
O41 La3 Ni3 O42 103.8(2) 5_465 . . . ?
O19 La3 Ni3 O42 103.8(2) 5_465 . . . ?
O4 La3 Ni3 O42 -162.3(3) . . . . ?
O8 La3 Ni3 O42 171.0(2) 21_676 . . . ?
O37 La3 Ni3 O42 29.8(2) . . . . ?
Ni4 La3 Ni3 O42 -154.79(19) . . . . ?
Ni2 La3 Ni3 O42 111.71(19) 5_465 . . . ?
O39 La3 Ni3 N1 56.6(3) 21_676 . . . ?
O29 La3 Ni3 N1 115.2(5) 21_676 . . . ?
O27 La3 Ni3 N1 121.9(3) . . . . ?
O41 La3 Ni3 N1 -77.5(3) 5_465 . . . ?
O19 La3 Ni3 N1 -77.4(3) 5_465 . . . ?
O4 La3 Ni3 N1 16.5(3) . . . . ?
O42 La3 Ni3 N1 178.8(3) . . . . ?
O8 La3 Ni3 N1 -10.3(3) 21_676 . . . ?
O37 La3 Ni3 N1 -151.4(3) . . . . ?
Ni4 La3 Ni3 N1 24.0(2) . . . . ?
Ni2 La3 Ni3 N1 -69.5(2) 5_465 . . . ?
O39 La3 Ni3 O20 141.8(2) 21_676 . . 5_465 ?
O29 La3 Ni3 O20 -159.5(4) 21_676 . . 5_465 ?
O27 La3 Ni3 O20 -152.9(2) . . . 5_465 ?
O41 La3 Ni3 O20 7.8(2) 5_465 . . 5_465 ?
O19 La3 Ni3 O20 7.8(2) 5_465 . . 5_465 ?
O4 La3 Ni3 O20 101.7(3) . . . 5_465 ?
O42 La3 Ni3 O20 -96.0(2) . . . 5_465 ?
O8 La3 Ni3 O20 75.0(2) 21_676 . . 5_465 ?
O37 La3 Ni3 O20 -66.2(2) . . . 5_465 ?
Ni4 La3 Ni3 O20 109.21(16) . . . 5_465 ?
Ni2 La3 Ni3 O20 15.71(16) 5_465 . . 5_465 ?
O39 La3 Ni3 O5 -32.5(2) 21_676 . . . ?
O29 La3 Ni3 O5 26.1(4) 21_676 . . . ?
O27 La3 Ni3 O5 32.7(2) . . . . ?
O41 La3 Ni3 O5 -166.6(2) 5_465 . . . ?
O19 La3 Ni3 O5 -166.6(2) 5_465 . . . ?
O4 La3 Ni3 O5 -72.7(3) . . . . ?
O42 La3 Ni3 O5 89.6(2) . . . . ?
O8 La3 Ni3 O5 -99.4(2) 21_676 . . . ?
O37 La3 Ni3 O5 119.5(2) . . . . ?
Ni4 La3 Ni3 O5 -65.15(16) . . . . ?
Ni2 La3 Ni3 O5 -158.65(16) 5_465 . . . ?
O29 La3 Ni4 O39 -60.0(3) 21_676 . . 21_676 ?
O27 La3 Ni4 O39 16.6(3) . . . 21_676 ?
O41 La3 Ni4 O39 -130.5(3) 5_465 . . 21_676 ?
O19 La3 Ni4 O39 163.6(3) 5_465 . . 21_676 ?
O4 La3 Ni4 O39 106.3(3) . . . 21_676 ?
O42 La3 Ni4 O39 84.1(3) . . . 21_676 ?
O8 La3 Ni4 O39 -159.8(3) 21_676 . . 21_676 ?
O37 La3 Ni4 O39 -92.0(5) . . . 21_676 ?
Ni3 La3 Ni4 O39 101.4(2) . . . 21_676 ?
Ni2 La3 Ni4 O39 -163.3(2) 5_465 . . 21_676 ?
O39 La3 Ni4 O10 -25.3(3) 21_676 . . 21_676 ?
O29 La3 Ni4 O10 -85.3(3) 21_676 . . 21_676 ?
O27 La3 Ni4 O10 -8.7(3) . . . 21_676 ?
O41 La3 Ni4 O10 -155.8(3) 5_465 . . 21_676 ?
O19 La3 Ni4 O10 138.2(3) 5_465 . . 21_676 ?
O4 La3 Ni4 O10 81.0(3) . . . 21_676 ?
O42 La3 Ni4 O10 58.8(3) . . . 21_676 ?
O8 La3 Ni4 O10 174.8(3) 21_676 . . 21_676 ?
O37 La3 Ni4 O10 -117.4(5) . . . 21_676 ?
Ni3 La3 Ni4 O10 76.0(2) . . . 21_676 ?
Ni2 La3 Ni4 O10 171.3(2) 5_465 . . 21_676 ?
O39 La3 Ni4 O3 -106.5(3) 21_676 . . . ?
O29 La3 Ni4 O3 -166.5(2) 21_676 . . . ?
O27 La3 Ni4 O3 -89.9(2) . . . . ?
O41 La3 Ni4 O3 123.05(19) 5_465 . . . ?
O19 La3 Ni4 O3 57.1(2) 5_465 . . . ?
O4 La3 Ni4 O3 -0.1(2) . . . . ?
O42 La3 Ni4 O3 -22.3(2) . . . . ?
O8 La3 Ni4 O3 93.7(3) 21_676 . . . ?
O37 La3 Ni4 O3 161.5(5) . . . . ?
Ni3 La3 Ni4 O3 -5.08(16) . . . . ?
Ni2 La3 Ni4 O3 90.23(16) 5_465 . . . ?
O39 La3 Ni4 O8 159.8(3) 21_676 . . 21_676 ?
O29 La3 Ni4 O8 99.8(2) 21_676 . . 21_676 ?
O27 La3 Ni4 O8 176.4(2) . . . 21_676 ?
O41 La3 Ni4 O8 29.3(2) 5_465 . . 21_676 ?
O19 La3 Ni4 O8 -36.6(2) 5_465 . . 21_676 ?
O4 La3 Ni4 O8 -93.8(3) . . . 21_676 ?
O42 La3 Ni4 O8 -116.0(3) . . . 21_676 ?
O37 La3 Ni4 O8 67.8(5) . . . 21_676 ?
Ni3 La3 Ni4 O8 -98.8(2) . . . 21_676 ?
Ni2 La3 Ni4 O8 -3.5(2) 5_465 . . 21_676 ?
O39 La3 Ni4 O6 74.4(3) 21_676 . . 21_676 ?
O29 La3 Ni4 O6 14.42(19) 21_676 . . 21_676 ?
O27 La3 Ni4 O6 91.02(19) . . . 21_676 ?
O41 La3 Ni4 O6 -56.07(19) 5_465 . . 21_676 ?
O19 La3 Ni4 O6 -122.00(19) 5_465 . . 21_676 ?
O4 La3 Ni4 O6 -179.2(2) . . . 21_676 ?
O42 La3 Ni4 O6 158.6(2) . . . 21_676 ?
O8 La3 Ni4 O6 -85.4(3) 21_676 . . 21_676 ?
O37 La3 Ni4 O6 -17.6(5) . . . 21_676 ?
Ni3 La3 Ni4 O6 175.80(15) . . . 21_676 ?
Ni2 La3 Ni4 O6 -88.89(15) 5_465 . . 21_676 ?
O39 La3 Ni4 N2 157.4(3) 21_676 . . 21_676 ?
O29 La3 Ni4 N2 97.4(3) 21_676 . . 21_676 ?
O27 La3 Ni4 N2 174.0(3) . . . 21_676 ?
O41 La3 Ni4 N2 26.9(3) 5_465 . . 21_676 ?
O19 La3 Ni4 N2 -39.0(3) 5_465 . . 21_676 ?
O4 La3 Ni4 N2 -96.2(3) . . . 21_676 ?
O42 La3 Ni4 N2 -118.4(3) . . . 21_676 ?
O8 La3 Ni4 N2 -2.4(3) 21_676 . . 21_676 ?
O37 La3 Ni4 N2 65.4(5) . . . 21_676 ?
Ni3 La3 Ni4 N2 -101.2(2) . . . 21_676 ?
Ni2 La3 Ni4 N2 -5.9(2) 5_465 . . 21_676 ?
O48 La4 Ni5 O40 -128.7(17) 5_465 . . . ?
O48 La4 Ni5 O40 24.5(4) 9_456 . . . ?
O48 La4 Ni5 O40 -69.8(3) . . . . ?
O40 La4 Ni5 O40 93.39(12) 9_456 . . . ?
O40 La4 Ni5 O40 -132.9(2) 5_465 . . . ?
O16 La4 Ni5 O40 -161.1(3) . . . . ?
O16 La4 Ni5 O40 161.3(3) 5_465 . . . ?
O16 La4 Ni5 O40 100.5(3) 9_456 . . . ?
Ni5 La4 Ni5 O40 103.0(2) 9_456 . . . ?
Ni5 La4 Ni5 O40 -164.9(2) 5_465 . . . ?
O48 La4 Ni5 O17 -150.4(17) 5_465 . . . ?
O48 La4 Ni5 O17 2.9(5) 9_456 . . . ?
O48 La4 Ni5 O17 -91.4(4) . . . . ?
O40 La4 Ni5 O17 71.8(3) 9_456 . . . ?
O40 La4 Ni5 O17 -154.6(3) 5_465 . . . ?
O40 La4 Ni5 O17 -21.6(4) . . . . ?
O16 La4 Ni5 O17 177.3(4) . . . . ?
O16 La4 Ni5 O17 139.7(3) 5_465 . . . ?
O16 La4 Ni5 O17 78.9(3) 9_456 . . . ?
Ni5 La4 Ni5 O17 81.4(3) 9_456 . . . ?
Ni5 La4 Ni5 O17 173.5(3) 5_465 . . . ?
O48 La4 Ni5 O15 124.4(17) 5_465 . . 9_456 ?
O48 La4 Ni5 O15 -82.3(4) 9_456 . . 9_456 ?
O48 La4 Ni5 O15 -176.6(3) . . . 9_456 ?
O40 La4 Ni5 O15 -13.4(2) 9_456 . . 9_456 ?
O40 La4 Ni5 O15 120.2(2) 5_465 . . 9_456 ?
O40 La4 Ni5 O15 -106.8(3) . . . 9_456 ?
O16 La4 Ni5 O15 92.1(3) . . . 9_456 ?
O16 La4 Ni5 O15 54.5(2) 5_465 . . 9_456 ?
O16 La4 Ni5 O15 -6.3(2) 9_456 . . 9_456 ?
Ni5 La4 Ni5 O15 -3.82(19) 9_456 . . 9_456 ?
Ni5 La4 Ni5 O15 88.25(18) 5_465 . . 9_456 ?
O48 La4 Ni5 O13 -52.9(17) 5_465 . . . ?
O48 La4 Ni5 O13 100.3(4) 9_456 . . . ?
O48 La4 Ni5 O13 6.0(3) . . . . ?
O40 La4 Ni5 O13 169.2(2) 9_456 . . . ?
O40 La4 Ni5 O13 -57.1(2) 5_465 . . . ?
O40 La4 Ni5 O13 75.8(3) . . . . ?
O16 La4 Ni5 O13 -85.3(3) . . . . ?
O16 La4 Ni5 O13 -122.8(2) 5_465 . . . ?
O16 La4 Ni5 O13 176.3(2) 9_456 . . . ?
Ni5 La4 Ni5 O13 178.83(19) 9_456 . . . ?
Ni5 La4 Ni5 O13 -89.1(2) 5_465 . . . ?
O48 La4 Ni5 O16 32.4(17) 5_465 . . . ?
O48 La4 Ni5 O16 -174.4(4) 9_456 . . . ?
O48 La4 Ni5 O16 91.3(3) . . . . ?
O40 La4 Ni5 O16 -105.5(3) 9_456 . . . ?
O40 La4 Ni5 O16 28.2(3) 5_465 . . . ?
O40 La4 Ni5 O16 161.1(3) . . . . ?
O16 La4 Ni5 O16 -37.6(2) 5_465 . . . ?
O16 La4 Ni5 O16 -98.4(4) 9_456 . . . ?
Ni5 La4 Ni5 O16 -95.9(2) 9_456 . . . ?
Ni5 La4 Ni5 O16 -3.8(2) 5_465 . . . ?
O48 La4 Ni5 N4 32.6(17) 5_465 . . . ?
O48 La4 Ni5 N4 -174.1(4) 9_456 . . . ?
O48 La4 Ni5 N4 91.6(4) . . . . ?
O40 La4 Ni5 N4 -105.3(3) 9_456 . . . ?
O40 La4 Ni5 N4 28.4(3) 5_465 . . . ?
O40 La4 Ni5 N4 161.3(4) . . . . ?
O16 La4 Ni5 N4 0.2(3) . . . . ?
O16 La4 Ni5 N4 -37.3(3) 5_465 . . . ?
O16 La4 Ni5 N4 -98.2(3) 9_456 . . . ?
Ni5 La4 Ni5 N4 -95.7(3) 9_456 . . . ?
Ni5 La4 Ni5 N4 -3.6(3) 5_465 . . . ?
O41 Ni2 Na O47 87.4(5) . . . . ?
O18 Ni2 Na O47 -21.7(5) . . . . ?
O7 Ni2 Na O47 156.5(5) 17_667 . . . ?
O19 Ni2 Na O47 -160.3(5) . . . . ?
O11 Ni2 Na O47 16.0(5) . . . . ?
N5 Ni2 Na O47 -92.4(5) . . . . ?
La2 Ni2 Na O47 37.7(5) . . . . ?
La3 Ni2 Na O47 139.5(4) 9_456 . . . ?
O41 Ni2 Na O11 71.4(3) . . . . ?
O18 Ni2 Na O11 -37.7(3) . . . . ?
O7 Ni2 Na O11 140.5(3) 17_667 . . . ?
O19 Ni2 Na O11 -176.3(3) . . . . ?
N5 Ni2 Na O11 -108.5(3) . . . . ?
La2 Ni2 Na O11 21.7(3) . . . . ?
La3 Ni2 Na O11 123.5(2) 9_456 . . . ?
O41 Ni2 Na O7 -69.2(3) . . . 17_667 ?
O18 Ni2 Na O7 -178.2(3) . . . 17_667 ?
O19 Ni2 Na O7 43.2(3) . . . 17_667 ?
O11 Ni2 Na O7 -140.5(3) . . . 17_667 ?
N5 Ni2 Na O7 111.0(3) . . . 17_667 ?
La2 Ni2 Na O7 -118.9(2) . . . 17_667 ?
La3 Ni2 Na O7 -17.0(2) 9_456 . . 17_667 ?
O41 Ni2 Na O46 170.9(3) . . . . ?
O18 Ni2 Na O46 61.8(3) . . . . ?
O7 Ni2 Na O46 -120.0(3) 17_667 . . . ?
O19 Ni2 Na O46 -76.8(3) . . . . ?
O11 Ni2 Na O46 99.5(3) . . . . ?
N5 Ni2 Na O46 -8.9(3) . . . . ?
La2 Ni2 Na O46 121.19(18) . . . . ?
La3 Ni2 Na O46 -136.97(18) 9_456 . . . ?
O41 Ni2 Na O31 4.4(4) . . . . ?
O18 Ni2 Na O31 -104.7(4) . . . . ?
O7 Ni2 Na O31 73.5(4) 17_667 . . . ?
O19 Ni2 Na O31 116.7(4) . . . . ?
O11 Ni2 Na O31 -67.0(4) . . . . ?
N5 Ni2 Na O31 -175.4(4) . . . . ?
La2 Ni2 Na O31 -45.3(4) . . . . ?
La3 Ni2 Na O31 56.5(4) 9_456 . . . ?
O41 Ni2 Na O22 -117.5(3) . . . . ?
O18 Ni2 Na O22 133.4(3) . . . . ?
O7 Ni2 Na O22 -48.3(3) 17_667 . . . ?
O19 Ni2 Na O22 -5.1(3) . . . . ?
O11 Ni2 Na O22 171.2(3) . . . . ?
N5 Ni2 Na O22 62.7(3) . . . . ?
La2 Ni2 Na O22 -167.17(19) . . . . ?
La3 Ni2 Na O22 -65.3(2) 9_456 . . . ?
O41 Ni2 Na O21 -62.6(3) . . . . ?
O18 Ni2 Na O21 -171.7(3) . . . . ?
O7 Ni2 Na O21 6.5(3) 17_667 . . . ?
O19 Ni2 Na O21 49.7(3) . . . . ?
O11 Ni2 Na O21 -134.0(4) . . . . ?
N5 Ni2 Na O21 117.6(3) . . . . ?
La2 Ni2 Na O21 -112.3(2) . . . . ?
La3 Ni2 Na O21 -10.5(3) 9_456 . . . ?
O4 Ni3 O2 C1 8.4(12) . . . . ?
O42 Ni3 O2 C1 166.5(6) . . . . ?
N1 Ni3 O2 C1 -13.3(6) . . . . ?
O20 Ni3 O2 C1 -101.9(6) 5_465 . . . ?
O5 Ni3 O2 C1 70.3(6) . . . . ?
La3 Ni3 O2 C1 175.9(5) . . . . ?
O39 Ni4 O3 C4 -39.3(6) 21_676 . . . ?
O10 Ni4 O3 C4 -136.7(6) 21_676 . . . ?
O8 Ni4 O3 C4 47.3(6) 21_676 . . . ?
O6 Ni4 O3 C4 161(5) 21_676 . . . ?
N2 Ni4 O3 C4 129.5(6) 21_676 . . . ?
La3 Ni4 O3 C4 1.7(6) . . . . ?
O2 Ni3 O4 C4 -1.5(11) . . . . ?
O42 Ni3 O4 C4 -160.5(6) . . . . ?
N1 Ni3 O4 C4 20.2(6) . . . . ?
O20 Ni3 O4 C4 108.1(6) 5_465 . . . ?
O5 Ni3 O4 C4 -63.6(6) . . . . ?
La3 Ni3 O4 C4 -173.3(6) . . . . ?
O2 Ni3 O4 La3 171.7(7) . . . . ?
O42 Ni3 O4 La3 12.7(2) . . . . ?
N1 Ni3 O4 La3 -166.6(3) . . . . ?
O20 Ni3 O4 La3 -78.6(2) 5_465 . . . ?
O5 Ni3 O4 La3 109.7(2) . . . . ?
O39 La3 O4 C4 31.3(9) 21_676 . . . ?
O29 La3 O4 C4 21.8(10) 21_676 . . . ?
O27 La3 O4 C4 95.1(9) . . . . ?
O41 La3 O4 C4 -80.3(9) 5_465 . . . ?
O19 La3 O4 C4 -120.3(9) 5_465 . . . ?
O42 La3 O4 C4 158.4(9) . . . . ?
O8 La3 O4 C4 -39.9(9) 21_676 . . . ?
O37 La3 O4 C4 -172.7(8) . . . . ?
Ni3 La3 O4 C4 169.2(10) . . . . ?
Ni4 La3 O4 C4 -2.0(8) . . . . ?
Ni2 La3 O4 C4 -94.6(9) 5_465 . . . ?
O39 La3 O4 Ni3 -137.9(2) 21_676 . . . ?
O29 La3 O4 Ni3 -147.4(2) 21_676 . . . ?
O27 La3 O4 Ni3 -74.1(2) . . . . ?
O41 La3 O4 Ni3 110.5(2) 5_465 . . . ?
O19 La3 O4 Ni3 70.5(2) 5_465 . . . ?
O42 La3 O4 Ni3 -10.86(18) . . . . ?
O8 La3 O4 Ni3 150.9(3) 21_676 . . . ?
O37 La3 O4 Ni3 18.1(4) . . . . ?
Ni4 La3 O4 Ni3 -171.2(3) . . . . ?
Ni2 La3 O4 Ni3 96.21(18) 5_465 . . . ?
O4 Ni3 O5 C5 -143.1(7) . . . . ?
O2 Ni3 O5 C5 52.3(7) . . . . ?
O42 Ni3 O5 C5 -53.0(7) . . . . ?
N1 Ni3 O5 C5 134.8(7) . . . . ?
O20 Ni3 O5 C5 123.1(15) 5_465 . . . ?
La3 Ni3 O5 C5 -100.0(7) . . . . ?
O39 La1 O6 C5 -176.5(9) . . . . ?
O43 La1 O6 C5 -67.2(8) . . . . ?
O42 La1 O6 C5 -1.3(8) . . . . ?
O27 La1 O6 C5 66.0(8) . . . . ?
O36 La1 O6 C5 49.9(10) . . . . ?
O28 La1 O6 C5 -170.5(7) 17_667 . . . ?
O29 La1 O6 C5 115.3(8) . . . . ?
O9 La1 O6 C5 -99.0(8) . . . . ?
N8 La1 O6 C5 90.8(8) . . . . ?
La3 La1 O6 C5 148.2(8) 17_667 . . . ?
La3 La1 O6 C5 32.5(8) . . . . ?
O39 La1 O6 Ni4 -12.50(19) . . . 17_667 ?
O43 La1 O6 Ni4 96.9(2) . . . 17_667 ?
O42 La1 O6 Ni4 162.7(2) . . . 17_667 ?
O27 La1 O6 Ni4 -130.0(2) . . . 17_667 ?
O36 La1 O6 Ni4 -146.1(4) . . . 17_667 ?
O28 La1 O6 Ni4 -6.5(3) 17_667 . . 17_667 ?
O29 La1 O6 Ni4 -80.7(2) . . . 17_667 ?
O9 La1 O6 Ni4 65.0(2) . . . 17_667 ?
N8 La1 O6 Ni4 -105.2(2) . . . 17_667 ?
La3 La1 O6 Ni4 -47.76(17) 17_667 . . 17_667 ?
La3 La1 O6 Ni4 -163.52(18) . . . 17_667 ?
O14 Ni1 O9 C9 53.6(18) . . . . ?
O43 Ni1 O9 C9 -171.3(6) . . . . ?
O12 Ni1 O9 C9 -87.5(6) . . . . ?
O44 Ni1 O9 C9 91.1(6) . . . . ?
N3 Ni1 O9 C9 -6.4(6) . . . . ?
O14 Ni1 O9 La1 -129.1(15) . . . . ?
O43 Ni1 O9 La1 6.0(2) . . . . ?
O12 Ni1 O9 La1 89.7(2) . . . . ?
O44 Ni1 O9 La1 -91.6(3) . . . . ?
N3 Ni1 O9 La1 170.9(3) . . . . ?
O39 La1 O9 C9 29.1(8) . . . . ?
O43 La1 O9 C9 170.6(9) . . . . ?
O42 La1 O9 C9 -115.9(8) . . . . ?
O27 La1 O9 C9 -69.3(9) . . . . ?
O36 La1 O9 C9 160.4(8) . . . . ?
O6 La1 O9 C9 -39.4(8) . . . . ?
O28 La1 O9 C9 99.0(8) 17_667 . . . ?
O29 La1 O9 C9 21.5(9) . . . . ?
N8 La1 O9 C9 -17.0(10) . . . . ?
La3 La1 O9 C9 27.1(8) 17_667 . . . ?
La3 La1 O9 C9 -114.3(8) . . . . ?
O39 La1 O9 Ni1 -147.0(3) . . . . ?
O43 La1 O9 Ni1 -5.4(2) . . . . ?
O42 La1 O9 Ni1 68.0(2) . . . . ?
O27 La1 O9 Ni1 114.6(3) . . . . ?
O36 La1 O9 Ni1 -15.7(4) . . . . ?
O6 La1 O9 Ni1 144.5(3) . . . . ?
O28 La1 O9 Ni1 -77.0(2) 17_667 . . . ?
O29 La1 O9 Ni1 -154.5(2) . . . . ?
N8 La1 O9 Ni1 167.0(3) . . . . ?
La3 La1 O9 Ni1 -148.95(18) 17_667 . . . ?
La3 La1 O9 Ni1 69.7(3) . . . . ?
O41 Ni2 O11 C12 34.5(6) . . . . ?
O18 Ni2 O11 C12 -50.2(6) . . . . ?
O7 Ni2 O11 C12 131.4(6) 17_667 . . . ?
O19 Ni2 O11 C12 -147(4) . . . . ?
N5 Ni2 O11 C12 -132.0(6) . . . . ?
Na Ni2 O11 C12 158.6(7) . . . . ?
La2 Ni2 O11 C12 -5.1(6) . . . . ?
La3 Ni2 O11 C12 52.0(7) 9_456 . . . ?
O41 Ni2 O11 Na -124.1(2) . . . . ?
O18 Ni2 O11 Na 151.2(2) . . . . ?
O7 Ni2 O11 Na -27.2(2) 17_667 . . . ?
O19 Ni2 O11 Na 54(4) . . . . ?
N5 Ni2 O11 Na 69.4(3) . . . . ?
La2 Ni2 O11 Na -163.67(19) . . . . ?
La3 Ni2 O11 Na -106.5(2) 9_456 . . . ?
O47 Na O11 C12 34.5(8) . . . . ?
O7 Na O11 C12 -131.5(7) 17_667 . . . ?
O46 Na O11 C12 124.8(7) . . . . ?
O31 Na O11 C12 -46.3(7) . . . . ?
O22 Na O11 C12 -173.5(7) . . . . ?
O21 Na O11 C12 -63.4(9) . . . . ?
Ni2 Na O11 C12 -155.5(8) . . . . ?
O47 Na O11 Ni2 -170.0(3) . . . . ?
O7 Na O11 Ni2 24.0(2) 17_667 . . . ?
O46 Na O11 Ni2 -79.7(3) . . . . ?
O31 Na O11 Ni2 109.2(3) . . . . ?
O22 Na O11 Ni2 -18.0(7) . . . . ?
O21 Na O11 Ni2 92.2(5) . . . . ?
O9 Ni1 O12 C12 99.6(5) . . . . ?
O14 Ni1 O12 C12 -75.0(5) . . . . ?
O43 Ni1 O12 C12 -177.6(5) . . . . ?
O44 Ni1 O12 C12 -66(3) . . . . ?
N3 Ni1 O12 C12 16.2(5) . . . . ?
O9 Ni1 O12 La2 -99.4(2) . . . . ?
O14 Ni1 O12 La2 86.1(2) . . . . ?
O43 Ni1 O12 La2 -16.6(2) . . . . ?
O44 Ni1 O12 La2 95(3) . . . . ?
N3 Ni1 O12 La2 177.3(2) . . . . ?
O41 La2 O12 C12 -53.3(7) . . . . ?
O40 La2 O12 C12 60.7(8) . . . . ?
O43 La2 O12 C12 167.8(8) . . . . ?
O37 La2 O12 C12 -43.0(8) 9_456 . . . ?
O18 La2 O12 C12 17.0(7) . . . . ?
O48 La2 O12 C12 147.5(7) . . . . ?
O38 La2 O12 C12 -129.6(9) 9_456 . . . ?
O13 La2 O12 C12 90.0(7) . . . . ?
O28 La2 O12 C12 -120.3(7) 17_667 . . . ?
Ni2 La2 O12 C12 -18.7(7) . . . . ?
La4 La2 O12 C12 104.0(7) . . . . ?
O41 La2 O12 Ni1 153.7(2) . . . . ?
O40 La2 O12 Ni1 -92.3(2) . . . . ?
O43 La2 O12 Ni1 14.72(18) . . . . ?
O37 La2 O12 Ni1 164.0(2) 9_456 . . . ?
O18 La2 O12 Ni1 -136.0(2) . . . . ?
O48 La2 O12 Ni1 -5.6(4) . . . . ?
O38 La2 O12 Ni1 77.4(8) 9_456 . . . ?
O13 La2 O12 Ni1 -63.0(2) . . . . ?
O28 La2 O12 Ni1 86.6(2) 17_667 . . . ?
Ni2 La2 O12 Ni1 -171.8(2) . . . . ?
La4 La2 O12 Ni1 -49.0(3) . . . . ?
O40 Ni5 O13 C13 175.3(6) . . . . ?
O17 Ni5 O13 C13 -84.8(6) . . . . ?
O15 Ni5 O13 C13 -15(3) 9_456 . . . ?
O16 Ni5 O13 C13 89.1(6) . . . . ?
N4 Ni5 O13 C13 7.5(6) . . . . ?
La4 Ni5 O13 C13 134.4(6) . . . . ?
O40 Ni5 O13 La2 -13.3(2) . . . . ?
O17 Ni5 O13 La2 86.6(3) . . . . ?
O15 Ni5 O13 La2 156(3) 9_456 . . . ?
O16 Ni5 O13 La2 -99.5(2) . . . . ?
N4 Ni5 O13 La2 178.9(3) . . . . ?
La4 Ni5 O13 La2 -54.20(19) . . . . ?
O41 La2 O13 C13 68.7(10) . . . . ?
O40 La2 O13 C13 178.9(10) . . . . ?
O43 La2 O13 C13 -44.1(9) . . . . ?
O37 La2 O13 C13 162.9(9) 9_456 . . . ?
O18 La2 O13 C13 101.8(9) . . . . ?
O48 La2 O13 C13 -110.4(9) . . . . ?
O38 La2 O13 C13 -140.8(9) 9_456 . . . ?
O12 La2 O13 C13 25.0(9) . . . . ?
O28 La2 O13 C13 -29.5(10) 17_667 . . . ?
Ni2 La2 O13 C13 80.5(9) . . . . ?
La4 La2 O13 C13 -146.4(9) . . . . ?
O41 La2 O13 Ni5 -98.2(3) . . . . ?
O40 La2 O13 Ni5 11.9(2) . . . . ?
O43 La2 O13 Ni5 149.0(3) . . . . ?
O37 La2 O13 Ni5 -4.0(4) 9_456 . . . ?
O18 La2 O13 Ni5 -65.2(2) . . . . ?
O48 La2 O13 Ni5 82.7(3) . . . . ?
O38 La2 O13 Ni5 52.3(4) 9_456 . . . ?
O12 La2 O13 Ni5 -141.9(3) . . . . ?
O28 La2 O13 Ni5 163.59(19) 17_667 . . . ?
Ni2 La2 O13 Ni5 -86.5(2) . . . . ?
La4 La2 O13 Ni5 46.72(18) . . . . ?
O9 Ni1 O14 C13 166.1(14) . . . . ?
O43 Ni1 O14 C13 32.1(7) . . . . ?
O12 Ni1 O14 C13 -52.7(7) . . . . ?
O44 Ni1 O14 C13 128.2(7) . . . . ?
N3 Ni1 O14 C13 -134.4(7) . . . . ?
O40 Ni5 O16 C16 179.2(6) . . . . ?
O17 Ni5 O16 C16 3(3) . . . . ?
O15 Ni5 O16 C16 78.9(6) 9_456 . . . ?
O13 Ni5 O16 C16 -96.1(6) . . . . ?
N4 Ni5 O16 C16 -13.2(6) . . . . ?
La4 Ni5 O16 C16 166.6(6) . . . . ?
O40 Ni5 O16 La4 12.6(2) . . . . ?
O17 Ni5 O16 La4 -164(2) . . . . ?
O15 Ni5 O16 La4 -87.7(2) 9_456 . . . ?
O13 Ni5 O16 La4 97.3(2) . . . . ?
N4 Ni5 O16 La4 -179.8(3) . . . . ?
O48 La4 O16 C16 29.6(10) 5_465 . . . ?
O48 La4 O16 C16 -152.3(9) 9_456 . . . ?
O48 La4 O16 C16 118.1(9) . . . . ?
O40 La4 O16 C16 -61.1(9) 9_456 . . . ?
O40 La4 O16 C16 50.5(8) 5_465 . . . ?
O40 La4 O16 C16 -170.6(9) . . . . ?
O16 La4 O16 C16 -20.3(8) 5_465 . . . ?
O16 La4 O16 C16 -94.7(8) 9_456 . . . ?
Ni5 La4 O16 C16 -159.5(10) . . . . ?
Ni5 La4 O16 C16 -73.3(8) 9_456 . . . ?
Ni5 La4 O16 C16 16.0(8) 5_465 . . . ?
O48 La4 O16 Ni5 -170.8(4) 5_465 . . . ?
O48 La4 O16 Ni5 7.2(5) 9_456 . . . ?
O48 La4 O16 Ni5 -82.4(3) . . . . ?
O40 La4 O16 Ni5 98.4(3) 9_456 . . . ?
O40 La4 O16 Ni5 -150.0(3) 5_465 . . . ?
O40 La4 O16 Ni5 -11.05(19) . . . . ?
O16 La4 O16 Ni5 139.2(2) 5_465 . . . ?
O16 La4 O16 Ni5 64.8(3) 9_456 . . . ?
Ni5 La4 O16 Ni5 86.21(18) 9_456 . . . ?
Ni5 La4 O16 Ni5 175.5(3) 5_465 . . . ?
O40 Ni5 O17 C17 34.3(8) . . . . ?
O15 Ni5 O17 C17 134.4(8) 9_456 . . . ?
O13 Ni5 O17 C17 -50.5(8) . . . . ?
O16 Ni5 O17 C17 -149(2) . . . . ?
N4 Ni5 O17 C17 -133.5(8) . . . . ?
La4 Ni5 O17 C17 48.8(9) . . . . ?
O41 Ni2 O18 C17 179.1(6) . . . . ?
O7 Ni2 O18 C17 -67(2) 17_667 . . . ?
O19 Ni2 O18 C17 95.3(6) . . . . ?
O11 Ni2 O18 C17 -81.4(6) . . . . ?
N5 Ni2 O18 C17 13.8(6) . . . . ?
Na Ni2 O18 C17 -55.8(6) . . . . ?
La2 Ni2 O18 C17 -168.4(7) . . . . ?
La3 Ni2 O18 C17 138.2(5) 9_456 . . . ?
O41 Ni2 O18 La2 -12.5(2) . . . . ?
O7 Ni2 O18 La2 101.6(19) 17_667 . . . ?
O19 Ni2 O18 La2 -96.3(2) . . . . ?
O11 Ni2 O18 La2 87.0(2) . . . . ?
N5 Ni2 O18 La2 -177.9(3) . . . . ?
Na Ni2 O18 La2 112.57(17) . . . . ?
La3 Ni2 O18 La2 -53.49(17) 9_456 . . . ?
O41 La2 O18 C17 173.8(9) . . . . ?
O40 La2 O18 C17 -46.1(8) . . . . ?
O43 La2 O18 C17 64.1(9) . . . . ?
O37 La2 O18 C17 -117.7(8) 9_456 . . . ?
O48 La2 O18 C17 -23.2(10) . . . . ?
O38 La2 O18 C17 -94.8(9) 9_456 . . . ?
O12 La2 O18 C17 97.4(8) . . . . ?
O13 La2 O18 C17 22.9(8) . . . . ?
O28 La2 O18 C17 163.8(8) 17_667 . . . ?
Ni2 La2 O18 C17 162.5(10) . . . . ?
La4 La2 O18 C17 -44.5(8) . . . . ?
O41 La2 O18 Ni2 11.24(19) . . . . ?
O40 La2 O18 Ni2 151.4(3) . . . . ?
O43 La2 O18 Ni2 -98.4(3) . . . . ?
O37 La2 O18 Ni2 79.8(3) 9_456 . . . ?
O48 La2 O18 Ni2 174.2(4) . . . . ?
O38 La2 O18 Ni2 102.7(3) 9_456 . . . ?
O12 La2 O18 Ni2 -65.2(2) . . . . ?
O13 La2 O18 Ni2 -139.6(3) . . . . ?
O28 La2 O18 Ni2 1.3(3) 17_667 . . . ?
La4 La2 O18 Ni2 152.97(16) . . . . ?
O41 Ni2 O19 C20 -171.3(6) . . . . ?
O18 Ni2 O19 C20 -86.5(6) . . . . ?
O7 Ni2 O19 C20 91.4(6) 17_667 . . . ?
O11 Ni2 O19 C20 10(4) . . . . ?
N5 Ni2 O19 C20 -4.9(6) . . . . ?
Na Ni2 O19 C20 62.0(6) . . . . ?
La2 Ni2 O19 C20 -131.6(5) . . . . ?
La3 Ni2 O19 C20 172.3(7) 9_456 . . . ?
O41 Ni2 O19 La3 16.4(2) . . . 9_456 ?
O18 Ni2 O19 La3 101.1(2) . . . 9_456 ?
O7 Ni2 O19 La3 -80.9(2) 17_667 . . 9_456 ?
O11 Ni2 O19 La3 -162(4) . . . 9_456 ?
N5 Ni2 O19 La3 -177.2(3) . . . 9_456 ?
Na Ni2 O19 La3 -110.3(2) . . . 9_456 ?
La2 Ni2 O19 La3 56.09(17) . . . 9_456 ?
O23 N6 O21 Na 168.4(7) . . . . ?
O22 N6 O21 Na -10.4(7) . . . . ?
O47 Na O21 N6 115.8(5) . . . . ?
O11 Na O21 N6 -138.9(6) . . . . ?
O7 Na O21 N6 -78.2(5) 17_667 . . . ?
O46 Na O21 N6 31.8(6) . . . . ?
O31 Na O21 N6 -156.3(6) . . . . ?
O22 Na O21 N6 6.3(4) . . . . ?
Ni2 Na O21 N6 -82.1(5) . . . . ?
O21 N6 O22 Na 12.5(9) . . . . ?
O23 N6 O22 Na -166.4(6) . . . . ?
O21 N6 O22 La5 -177.3(6) . . . . ?
O23 N6 O22 La5 3.9(7) . . . . ?
O47 Na O22 N6 -75.3(6) . . . . ?
O11 Na O22 N6 131.6(6) . . . . ?
O7 Na O22 N6 93.0(5) 17_667 . . . ?
O46 Na O22 N6 -163.3(5) . . . . ?
O31 Na O22 N6 12.7(6) . . . . ?
O21 Na O22 N6 -6.2(4) . . . . ?
Ni2 Na O22 N6 119.5(5) . . . . ?
O47 Na O22 La5 129.0(7) . . . . ?
O11 Na O22 La5 -24.1(12) . . . . ?
O7 Na O22 La5 -62.7(7) 17_667 . . . ?
O46 Na O22 La5 40.9(7) . . . . ?
O31 Na O22 La5 -143.1(7) . . . . ?
O21 Na O22 La5 -161.9(9) . . . . ?
Ni2 Na O22 La5 -36.2(8) . . . . ?
O25 La5 O22 N6 -84.7(5) . . . . ?
O25 La5 O22 N6 -152(6) 11_376 . . . ?
O25 La5 O22 N6 154.5(5) 8_667 . . . ?
O26 La5 O22 N6 -107.0(5) 11_376 . . . ?
O26 La5 O22 N6 172.5(4) 8_667 . . . ?
O26 La5 O22 N6 -136.7(5) . . . . ?
O22 La5 O22 N6 -27.4(5) 11_376 . . . ?
O22 La5 O22 N6 96.9(4) 8_667 . . . ?
O23 La5 O22 N6 24.0(5) 11_376 . . . ?
O23 La5 O22 N6 -2.2(4) . . . . ?
O23 La5 O22 N6 76.9(5) 8_667 . . . ?
O25 La5 O22 Na 71.6(7) . . . . ?
O25 La5 O22 Na 5(7) 11_376 . . . ?
O25 La5 O22 Na -49.1(7) 8_667 . . . ?
O26 La5 O22 Na 49.4(8) 11_376 . . . ?
O26 La5 O22 Na -31.1(8) 8_667 . . . ?
O26 La5 O22 Na 19.7(7) . . . . ?
O22 La5 O22 Na 129.0(7) 11_376 . . . ?
O22 La5 O22 Na -106.7(8) 8_667 . . . ?
O23 La5 O22 Na -179.6(7) 11_376 . . . ?
O23 La5 O22 Na 154.2(8) . . . . ?
O23 La5 O22 Na -126.7(8) 8_667 . . . ?
O21 N6 O23 La5 177.3(7) . . . . ?
O22 N6 O23 La5 -3.9(7) . . . . ?
O25 La5 O23 N6 81.7(5) . . . . ?
O25 La5 O23 N6 -179.1(4) 11_376 . . . ?
O25 La5 O23 N6 -21.7(5) 8_667 . . . ?
O26 La5 O23 N6 117.5(5) 11_376 . . . ?
O26 La5 O23 N6 -13.6(10) 8_667 . . . ?
O26 La5 O23 N6 45.5(5) . . . . ?
O22 La5 O23 N6 156.7(5) 11_376 . . . ?
O22 La5 O23 N6 2.2(4) . . . . ?
O22 La5 O23 N6 -98.1(5) 8_667 . . . ?
O23 La5 O23 N6 -151.1(5) 11_376 . . . ?
O23 La5 O23 N6 -77.3(6) 8_667 . . . ?
O25 La5 N7 O24 89(8) . . . . ?
O25 La5 N7 O24 -4(8) 11_376 . . . ?
O25 La5 N7 O24 -114(8) 8_667 . . . ?
O26 La5 N7 O24 0(8) 11_376 . . . ?
O26 La5 N7 O24 -65(8) 8_667 . . . ?
O26 La5 N7 O24 -98(8) . . . . ?
O22 La5 N7 O24 65(8) 11_376 . . . ?
O22 La5 N7 O24 177(100) . . . . ?
O22 La5 N7 O24 -88(8) 8_667 . . . ?
O23 La5 N7 O24 79(8) 11_376 . . . ?
O23 La5 N7 O24 132(8) . . . . ?
O23 La5 N7 O24 -173(8) 8_667 . . . ?
O25 La5 N7 O26 -173.1(8) . . . . ?
O25 La5 N7 O26 93.5(5) 11_376 . . . ?
O25 La5 N7 O26 -15.9(5) 8_667 . . . ?
O26 La5 N7 O26 98.1(6) 11_376 . . . ?
O26 La5 N7 O26 32.6(5) 8_667 . . . ?
O22 La5 N7 O26 162.8(5) 11_376 . . . ?
O22 La5 N7 O26 -85.2(5) . . . . ?
O22 La5 N7 O26 9.8(8) 8_667 . . . ?
O23 La5 N7 O26 177.2(4) 11_376 . . . ?
O23 La5 N7 O26 -129.8(5) . . . . ?
O23 La5 N7 O26 -75.0(6) 8_667 . . . ?
O25 La5 N7 O25 -93.4(4) 11_376 . . . ?
O25 La5 N7 O25 157.2(5) 8_667 . . . ?
O26 La5 N7 O25 -88.8(5) 11_376 . . . ?
O26 La5 N7 O25 -154.3(5) 8_667 . . . ?
O26 La5 N7 O25 173.1(8) . . . . ?
O22 La5 N7 O25 -24.1(5) 11_376 . . . ?
O22 La5 N7 O25 87.9(5) . . . . ?
O22 La5 N7 O25 -177.1(4) 8_667 . . . ?
O23 La5 N7 O25 -9.7(6) 11_376 . . . ?
O23 La5 N7 O25 43.3(5) . . . . ?
O23 La5 N7 O25 98.1(5) 8_667 . . . ?
O24 N7 O25 La5 -174.3(7) . . . . ?
O26 N7 O25 La5 6.6(8) . . . . ?
O25 La5 O25 N7 95.4(4) 11_376 . . . ?
O25 La5 O25 N7 -24.2(5) 8_667 . . . ?
O26 La5 O25 N7 78.4(5) 11_376 . . . ?
O26 La5 O25 N7 27.3(5) 8_667 . . . ?
O26 La5 O25 N7 -3.8(4) . . . . ?
O22 La5 O25 N7 154.2(5) 11_376 . . . ?
O22 La5 O25 N7 -82.7(5) . . . . ?
O22 La5 O25 N7 42(6) 8_667 . . . ?
O23 La5 O25 N7 172.9(5) 11_376 . . . ?
O23 La5 O25 N7 -133.7(5) . . . . ?
O23 La5 O25 N7 -106.5(5) 8_667 . . . ?
O24 N7 O26 La5 174.4(7) . . . . ?
O25 N7 O26 La5 -6.5(8) . . . . ?
O25 La5 O26 N7 3.8(4) . . . . ?
O25 La5 O26 N7 -95.2(5) 11_376 . . . ?
O25 La5 O26 N7 162.2(6) 8_667 . . . ?
O26 La5 O26 N7 -70.5(6) 11_376 . . . ?
O26 La5 O26 N7 -144.4(5) 8_667 . . . ?
O22 La5 O26 N7 -19.0(6) 11_376 . . . ?
O22 La5 O26 N7 85.3(5) . . . . ?
O22 La5 O26 N7 -174.4(5) 8_667 . . . ?
O23 La5 O26 N7 -6.2(10) 11_376 . . . ?
O23 La5 O26 N7 52.3(5) . . . . ?
O23 La5 O26 N7 124.1(5) 8_667 . . . ?
O39 La1 N8 O28 -128(15) . . . . ?
O43 La1 N8 O28 83(15) . . . . ?
O42 La1 N8 O28 14(15) . . . . ?
O27 La1 N8 O28 18(15) . . . . ?
O36 La1 N8 O28 97(15) . . . . ?
O6 La1 N8 O28 -64(15) . . . . ?
O28 La1 N8 O28 160(15) 17_667 . . . ?
O29 La1 N8 O28 -159(16) . . . . ?
O9 La1 N8 O28 -85(15) . . . . ?
La3 La1 N8 O28 -138(15) 17_667 . . . ?
La3 La1 N8 O28 30(15) . . . . ?
O39 La1 N8 O29 31.5(4) . . . . ?
O43 La1 N8 O29 -117.2(4) . . . . ?
O42 La1 N8 O29 173.3(4) . . . . ?
O27 La1 N8 O29 177.1(7) . . . . ?
O36 La1 N8 O29 -103.9(5) . . . . ?
O6 La1 N8 O29 95.0(4) . . . . ?
O28 La1 N8 O29 -40.9(5) 17_667 . . . ?
O9 La1 N8 O29 74.1(6) . . . . ?
La3 La1 N8 O29 21.4(4) 17_667 . . . ?
La3 La1 N8 O29 -170.3(5) . . . . ?
O39 La1 N8 O27 -145.5(4) . . . . ?
O43 La1 N8 O27 65.7(6) . . . . ?
O42 La1 N8 O27 -3.8(4) . . . . ?
O36 La1 N8 O27 79.0(4) . . . . ?
O6 La1 N8 O27 -82.1(4) . . . . ?
O28 La1 N8 O27 142.1(4) 17_667 . . . ?
O29 La1 N8 O27 -177.1(7) . . . . ?
O9 La1 N8 O27 -103.0(5) . . . . ?
La3 La1 N8 O27 -155.6(5) 17_667 . . . ?
La3 La1 N8 O27 12.6(4) . . . . ?
O28 N8 O27 La3 33.0(13) . . . . ?
O29 N8 O27 La3 -150.5(6) . . . . ?
La1 N8 O27 La3 -147.8(9) . . . . ?
O28 N8 O27 La1 -179.2(6) . . . . ?
O29 N8 O27 La1 -2.7(7) . . . . ?
O39 La3 O27 N8 -57.9(8) 21_676 . . . ?
O29 La3 O27 N8 18.4(8) 21_676 . . . ?
O41 La3 O27 N8 46.9(9) 5_465 . . . ?
O19 La3 O27 N8 172.3(7) 5_465 . . . ?
O4 La3 O27 N8 -126.5(8) . . . . ?
O42 La3 O27 N8 168.8(9) . . . . ?
O8 La3 O27 N8 -65.0(9) 21_676 . . . ?
O37 La3 O27 N8 93.9(8) . . . . ?
Ni3 La3 O27 N8 -159.5(8) . . . . ?
Ni4 La3 O27 N8 -67.7(8) . . . . ?
Ni2 La3 O27 N8 111.9(9) 5_465 . . . ?
O39 La3 O27 La1 156.0(3) 21_676 . . . ?
O29 La3 O27 La1 -127.7(2) 21_676 . . . ?
O41 La3 O27 La1 -99.1(3) 5_465 . . . ?
O19 La3 O27 La1 26.2(4) 5_465 . . . ?
O4 La3 O27 La1 87.5(2) . . . . ?
O42 La3 O27 La1 22.80(17) . . . . ?
O8 La3 O27 La1 149.03(19) 21_676 . . . ?
O37 La3 O27 La1 -52.1(2) . . . . ?
Ni3 La3 O27 La1 54.50(17) . . . . ?
Ni4 La3 O27 La1 146.29(16) . . . . ?
Ni2 La3 O27 La1 -34.2(7) 5_465 . . . ?
O39 La1 O27 N8 37.4(5) . . . . ?
O43 La1 O27 N8 -136.1(4) . . . . ?
O42 La1 O27 N8 175.9(5) . . . . ?
O36 La1 O27 N8 -92.1(5) . . . . ?
O6 La1 O27 N8 95.9(4) . . . . ?
O28 La1 O27 N8 -43.2(5) 17_667 . . . ?
O29 La1 O27 N8 1.6(4) . . . . ?
O9 La1 O27 N8 123.7(5) . . . . ?
La3 La1 O27 N8 20.7(4) 17_667 . . . ?
La3 La1 O27 N8 -160.9(5) . . . . ?
O39 La1 O27 La3 -161.70(19) . . . . ?
O43 La1 O27 La3 24.8(3) . . . . ?
O42 La1 O27 La3 -23.20(17) . . . . ?
O36 La1 O27 La3 68.8(2) . . . . ?
O6 La1 O27 La3 -103.2(2) . . . . ?
O28 La1 O27 La3 117.7(2) 17_667 . . . ?
O29 La1 O27 La3 162.5(3) . . . . ?
O9 La1 O27 La3 -75.4(4) . . . . ?
N8 La1 O27 La3 160.9(5) . . . . ?
La3 La1 O27 La3 -178.39(19) 17_667 . . . ?
O29 N8 O28 La1 162.1(5) . . . 21_676 ?
O27 N8 O28 La1 -21.7(10) . . . 21_676 ?
La1 N8 O28 La1 -39(16) . . . 21_676 ?
O29 N8 O28 La2 -18.1(11) . . . 21_676 ?
O27 N8 O28 La2 158.1(5) . . . 21_676 ?
La1 N8 O28 La2 141(15) . . . 21_676 ?
O28 N8 O29 La3 52.6(12) . . . 17_667 ?
O27 N8 O29 La3 -123.8(6) . . . 17_667 ?
La1 N8 O29 La3 -126.4(8) . . . 17_667 ?
O28 N8 O29 La1 179.1(6) . . . . ?
O27 N8 O29 La1 2.6(7) . . . . ?
O39 La1 O29 N8 -146.2(5) . . . . ?
O43 La1 O29 N8 99.6(5) . . . . ?
O42 La1 O29 N8 -7.4(5) . . . . ?
O27 La1 O29 N8 -1.6(4) . . . . ?
O36 La1 O29 N8 70.0(5) . . . . ?
O6 La1 O29 N8 -84.3(4) . . . . ?
O28 La1 O29 N8 138.8(5) 17_667 . . . ?
O9 La1 O29 N8 -138.7(4) . . . . ?
La3 La1 O29 N8 -148.0(5) 17_667 . . . ?
La3 La1 O29 N8 8.3(4) . . . . ?
O39 La1 O29 La3 1.73(18) . . . 17_667 ?
O43 La1 O29 La3 -112.5(3) . . . 17_667 ?
O42 La1 O29 La3 140.56(17) . . . 17_667 ?
O27 La1 O29 La3 146.4(3) . . . 17_667 ?
O36 La1 O29 La3 -142.1(2) . . . 17_667 ?
O6 La1 O29 La3 63.7(2) . . . 17_667 ?
O28 La1 O29 La3 -73.21(19) 17_667 . . 17_667 ?
O9 La1 O29 La3 9.3(4) . . . 17_667 ?
N8 La1 O29 La3 148.0(5) . . . 17_667 ?
La3 La1 O29 La3 156.27(18) . . . 17_667 ?
O32 N9 O31 Na 143.4(12) . . . . ?
O30 N9 O31 Na -25(2) . . . . ?
O47 Na O31 N9 38.2(14) . . . . ?
O11 Na O31 N9 146.5(14) . . . . ?
O7 Na O31 N9 -143.3(14) 17_667 . . . ?
O46 Na O31 N9 106.8(17) . . . . ?
O22 Na O31 N9 -56.8(15) . . . . ?
O21 Na O31 N9 -42.6(13) . . . . ?
Ni2 Na O31 N9 -178.8(13) . . . . ?
O37 C22 O36 La1 39(2) . . . . ?
O38 C22 O36 La1 -178.5(10) . . . . ?
La6 C22 O36 La1 177.9(10) 9_456 . . . ?
La6 C22 O36 La1 179.9(11) 5_465 . . . ?
La6 C22 O36 La1 179.5(11) . . . . ?
O37 C22 O36 La6 -141.1(17) . . . 5_465 ?
O38 C22 O36 La6 1.7(15) . . . 5_465 ?
La6 C22 O36 La6 -2.0(7) 9_456 . . 5_465 ?
La6 C22 O36 La6 -0.3(11) . . . 5_465 ?
O37 C22 O36 La6 -139.2(17) . . . 9_456 ?
O38 C22 O36 La6 3.6(14) . . . 9_456 ?
La6 C22 O36 La6 2.0(7) 5_465 . . 9_456 ?
La6 C22 O36 La6 1.6(8) . . . 9_456 ?
O37 C22 O36 La6 -140.8(18) . . . . ?
O38 C22 O36 La6 2.0(15) . . . . ?
La6 C22 O36 La6 -1.6(8) 9_456 . . . ?
La6 C22 O36 La6 0.3(12) 5_465 . . . ?
O39 La1 O36 C22 173.4(11) . . . . ?
O43 La1 O36 C22 59.1(12) . . . . ?
O42 La1 O36 C22 -19.0(12) . . . . ?
O27 La1 O36 C22 -86.4(12) . . . . ?
O6 La1 O36 C22 -69.3(14) . . . . ?
O28 La1 O36 C22 140.0(13) 17_667 . . . ?
O29 La1 O36 C22 -137.0(12) . . . . ?
O9 La1 O36 C22 68.6(13) . . . . ?
N8 La1 O36 C22 -112.7(12) . . . . ?
La3 La1 O36 C22 -159.1(12) 17_667 . . . ?
La3 La1 O36 C22 -49.2(12) . . . . ?
O39 La1 O36 La6 -6.8(12) . . . 5_465 ?
O43 La1 O36 La6 -121.1(11) . . . 5_465 ?
O42 La1 O36 La6 160.8(11) . . . 5_465 ?
O27 La1 O36 La6 93.4(11) . . . 5_465 ?
O6 La1 O36 La6 110.5(11) . . . 5_465 ?
O28 La1 O36 La6 -40.2(11) 17_667 . . 5_465 ?
O29 La1 O36 La6 42.8(11) . . . 5_465 ?
O9 La1 O36 La6 -111.6(11) . . . 5_465 ?
N8 La1 O36 La6 67.1(11) . . . 5_465 ?
La3 La1 O36 La6 20.7(11) 17_667 . . 5_465 ?
La3 La1 O36 La6 130.6(11) . . . 5_465 ?
O39 La1 O36 La6 -10.2(10) . . . 9_456 ?
O43 La1 O36 La6 -124.5(9) . . . 9_456 ?
O42 La1 O36 La6 157.4(9) . . . 9_456 ?
O27 La1 O36 La6 90.0(9) . . . 9_456 ?
O6 La1 O36 La6 107.1(8) . . . 9_456 ?
O28 La1 O36 La6 -43.6(8) 17_667 . . 9_456 ?
O29 La1 O36 La6 39.4(8) . . . 9_456 ?
O9 La1 O36 La6 -115.0(9) . . . 9_456 ?
N8 La1 O36 La6 63.7(9) . . . 9_456 ?
La3 La1 O36 La6 17.3(9) 17_667 . . 9_456 ?
La3 La1 O36 La6 127.2(9) . . . 9_456 ?
O39 La1 O36 La6 -7.4(13) . . . . ?
O43 La1 O36 La6 -121.7(12) . . . . ?
O42 La1 O36 La6 160.2(12) . . . . ?
O27 La1 O36 La6 92.8(12) . . . . ?
O6 La1 O36 La6 110.0(12) . . . . ?
O28 La1 O36 La6 -40.7(12) 17_667 . . . ?
O29 La1 O36 La6 42.2(12) . . . . ?
O9 La1 O36 La6 -112.2(12) . . . . ?
N8 La1 O36 La6 66.5(12) . . . . ?
La3 La1 O36 La6 20.1(12) 17_667 . . . ?
La3 La1 O36 La6 130.0(13) . . . . ?
O36 C22 O37 La2 158.6(13) . . . 5_465 ?
O38 C22 O37 La2 8.6(12) . . . 5_465 ?
La6 C22 O37 La2 49.6(15) 9_456 . . 5_465 ?
La6 C22 O37 La2 50.1(16) 5_465 . . 5_465 ?
La6 C22 O37 La2 47.8(14) . . . 5_465 ?
O36 C22 O37 La3 24(2) . . . . ?
O38 C22 O37 La3 -126.3(8) . . . . ?
La6 C22 O37 La3 -85.3(14) 9_456 . . . ?
La6 C22 O37 La3 -84.9(14) 5_465 . . . ?
La6 C22 O37 La3 -87.1(12) . . . . ?
O39 La3 O37 C22 36.7(11) 21_676 . . . ?
O29 La3 O37 C22 67.9(10) 21_676 . . . ?
O27 La3 O37 C22 -9.1(10) . . . . ?
O41 La3 O37 C22 142.9(11) 5_465 . . . ?
O19 La3 O37 C22 -151.7(10) 5_465 . . . ?
O4 La3 O37 C22 -103.4(10) . . . . ?
O42 La3 O37 C22 -75.7(10) . . . . ?
O8 La3 O37 C22 148.8(10) 21_676 . . . ?
Ni3 La3 O37 C22 -92.9(10) . . . . ?
Ni4 La3 O37 C22 101.1(10) . . . . ?
Ni2 La3 O37 C22 174.4(10) 5_465 . . . ?
O39 La3 O37 La2 -100.0(3) 21_676 . . 5_465 ?
O29 La3 O37 La2 -68.7(2) 21_676 . . 5_465 ?
O27 La3 O37 La2 -145.8(3) . . . 5_465 ?
O41 La3 O37 La2 6.3(2) 5_465 . . 5_465 ?
O19 La3 O37 La2 71.7(2) 5_465 . . 5_465 ?
O4 La3 O37 La2 119.9(3) . . . 5_465 ?
O42 La3 O37 La2 147.7(3) . . . 5_465 ?
O8 La3 O37 La2 12.2(4) 21_676 . . 5_465 ?
Ni3 La3 O37 La2 130.5(2) . . . 5_465 ?
Ni4 La3 O37 La2 -35.6(6) . . . 5_465 ?
Ni2 La3 O37 La2 37.8(2) 5_465 . . 5_465 ?
O37 C22 O38 La6 146.2(9) . . . 9_456 ?
O36 C22 O38 La6 -4.4(18) . . . 9_456 ?
La6 C22 O38 La6 -2.5(8) 5_465 . . 9_456 ?
La6 C22 O38 La6 -2.0(11) . . . 9_456 ?
O37 C22 O38 La6 148.7(11) . . . 5_465 ?
O36 C22 O38 La6 -2.0(18) . . . 5_465 ?
La6 C22 O38 La6 2.5(8) 9_456 . . 5_465 ?
La6 C22 O38 La6 0.5(14) . . . 5_465 ?
O37 C22 O38 La6 148.2(11) . . . . ?
O36 C22 O38 La6 -2.5(19) . . . . ?
La6 C22 O38 La6 2.0(11) 9_456 . . . ?
La6 C22 O38 La6 -0.5(14) 5_465 . . . ?
O37 C22 O38 La2 -8.0(11) . . . 5_465 ?
O36 C22 O38 La2 -158.7(13) . . . 5_465 ?
La6 C22 O38 La2 -154.2(9) 9_456 . . 5_465 ?
La6 C22 O38 La2 -156.7(10) 5_465 . . 5_465 ?
La6 C22 O38 La2 -156.2(11) . . . 5_465 ?
O43 La1 O39 Ni4 -101.4(3) . . . 17_667 ?
O42 La1 O39 Ni4 5.5(4) . . . 17_667 ?
O27 La1 O39 Ni4 84.5(3) . . . 17_667 ?
O36 La1 O39 Ni4 165.3(3) . . . 17_667 ?
O6 La1 O39 Ni4 13.1(2) . . . 17_667 ?
O28 La1 O39 Ni4 -162.5(3) 17_667 . . 17_667 ?
O29 La1 O39 Ni4 112.7(3) . . . 17_667 ?
O9 La1 O39 Ni4 -62.2(2) . . . 17_667 ?
N8 La1 O39 Ni4 99.3(3) . . . 17_667 ?
La3 La1 O39 Ni4 114.5(3) 17_667 . . 17_667 ?
La3 La1 O39 Ni4 67.2(3) . . . 17_667 ?
O43 La1 O39 La3 144.2(2) . . . 17_667 ?
O42 La1 O39 La3 -109.0(3) . . . 17_667 ?
O27 La1 O39 La3 -30.0(3) . . . 17_667 ?
O36 La1 O39 La3 50.9(4) . . . 17_667 ?
O6 La1 O39 La3 -101.4(2) . . . 17_667 ?
O28 La1 O39 La3 83.1(2) 17_667 . . 17_667 ?
O29 La1 O39 La3 -1.79(18) . . . 17_667 ?
O9 La1 O39 La3 -176.6(3) . . . 17_667 ?
N8 La1 O39 La3 -15.2(2) . . . 17_667 ?
La3 La1 O39 La3 -47.3(3) . . . 17_667 ?
O17 Ni5 O40 La2 -74.7(3) . . . . ?
O15 Ni5 O40 La2 -164.4(2) 9_456 . . . ?
O13 Ni5 O40 La2 14.7(3) . . . . ?
O16 Ni5 O40 La2 105.7(2) . . . . ?
N4 Ni5 O40 La2 59.8(9) . . . . ?
La4 Ni5 O40 La2 119.0(3) . . . . ?
O17 Ni5 O40 La4 166.2(2) . . . . ?
O15 Ni5 O40 La4 76.6(3) 9_456 . . . ?
O13 Ni5 O40 La4 -104.3(3) . . . . ?
O16 Ni5 O40 La4 -13.4(2) . . . . ?
N4 Ni5 O40 La4 -59.2(9) . . . . ?
O41 La2 O40 Ni5 105.0(3) . . . . ?
O43 La2 O40 Ni5 -59.1(3) . . . . ?
O37 La2 O40 Ni5 155.5(3) 9_456 . . . ?
O18 La2 O40 Ni5 62.3(2) . . . . ?
O48 La2 O40 Ni5 -100.0(4) . . . . ?
O38 La2 O40 Ni5 -158.4(3) 9_456 . . . ?
O12 La2 O40 Ni5 18.2(3) . . . . ?
O13 La2 O40 Ni5 -12.4(2) . . . . ?
O28 La2 O40 Ni5 -159.9(2) 17_667 . . . ?
Ni2 La2 O40 Ni5 78.1(2) . . . . ?
La4 La2 O40 Ni5 -114.9(4) . . . . ?
O41 La2 O40 La4 -140.0(2) . . . . ?
O43 La2 O40 La4 55.9(3) . . . . ?
O37 La2 O40 La4 -89.5(3) 9_456 . . . ?
O18 La2 O40 La4 177.3(3) . . . . ?
O48 La2 O40 La4 14.9(4) . . . . ?
O38 La2 O40 La4 -43.4(3) 9_456 . . . ?
O12 La2 O40 La4 133.2(2) . . . . ?
O13 La2 O40 La4 102.5(3) . . . . ?
O28 La2 O40 La4 -45.0(4) 17_667 . . . ?
Ni2 La2 O40 La4 -166.99(18) . . . . ?
O48 La4 O40 Ni5 158.7(4) 5_465 . . . ?
O48 La4 O40 Ni5 -153.1(5) 9_456 . . . ?
O48 La4 O40 Ni5 100.9(4) . . . . ?
O40 La4 O40 Ni5 -106.8(2) 9_456 . . . ?
O40 La4 O40 Ni5 56.0(3) 5_465 . . . ?
O16 La4 O40 Ni5 11.4(2) . . . . ?
O16 La4 O40 Ni5 -23.0(3) 5_465 . . . ?
O16 La4 O40 Ni5 -63.7(2) 9_456 . . . ?
Ni5 La4 O40 Ni5 -80.0(2) 9_456 . . . ?
Ni5 La4 O40 Ni5 18.1(3) 5_465 . . . ?
O48 La4 O40 La2 42.3(6) 5_465 . . . ?
O48 La4 O40 La2 90.5(5) 9_456 . . . ?
O48 La4 O40 La2 -15.5(4) . . . . ?
O40 La4 O40 La2 136.78(19) 9_456 . . . ?
O40 La4 O40 La2 -60.3(4) 5_465 . . . ?
O16 La4 O40 La2 -104.9(3) . . . . ?
O16 La4 O40 La2 -139.4(2) 5_465 . . . ?
O16 La4 O40 La2 179.9(3) 9_456 . . . ?
Ni5 La4 O40 La2 -116.4(4) . . . . ?
Ni5 La4 O40 La2 163.58(18) 9_456 . . . ?
Ni5 La4 O40 La2 -98.3(2) 5_465 . . . ?
O18 Ni2 O41 La2 13.5(2) . . . . ?
O7 Ni2 O41 La2 -160.4(2) 17_667 . . . ?
O19 Ni2 O41 La2 104.7(2) . . . . ?
O11 Ni2 O41 La2 -75.4(2) . . . . ?
N5 Ni2 O41 La2 61.4(8) . . . . ?
Na Ni2 O41 La2 -118.09(17) . . . . ?
La3 Ni2 O41 La2 121.2(3) 9_456 . . . ?
O18 Ni2 O41 La3 -107.6(2) . . . 9_456 ?
O7 Ni2 O41 La3 78.4(2) 17_667 . . 9_456 ?
O19 Ni2 O41 La3 -16.5(2) . . . 9_456 ?
O11 Ni2 O41 La3 163.4(2) . . . 9_456 ?
N5 Ni2 O41 La3 -59.8(8) . . . 9_456 ?
Na Ni2 O41 La3 120.74(17) . . . 9_456 ?
La2 Ni2 O41 La3 -121.2(3) . . . 9_456 ?
O40 La2 O41 Ni2 -55.8(3) . . . . ?
O43 La2 O41 Ni2 108.1(2) . . . . ?
O37 La2 O41 Ni2 -107.4(3) 9_456 . . . ?
O18 La2 O41 Ni2 -11.61(19) . . . . ?
O48 La2 O41 Ni2 -160.2(5) . . . . ?
O38 La2 O41 Ni2 -133.2(3) 9_456 . . . ?
O12 La2 O41 Ni2 65.3(2) . . . . ?
O13 La2 O41 Ni2 22.1(3) . . . . ?
O28 La2 O41 Ni2 160.4(3) 17_667 . . . ?
La4 La2 O41 Ni2 -92.3(2) . . . . ?
O40 La2 O41 La3 58.5(3) . . . 9_456 ?
O43 La2 O41 La3 -137.7(2) . . . 9_456 ?
O37 La2 O41 La3 6.9(2) 9_456 . . 9_456 ?
O18 La2 O41 La3 102.6(2) . . . 9_456 ?
O48 La2 O41 La3 -45.9(6) . . . 9_456 ?
O38 La2 O41 La3 -18.9(3) 9_456 . . 9_456 ?
O12 La2 O41 La3 179.6(2) . . . 9_456 ?
O13 La2 O41 La3 136.3(2) . . . 9_456 ?
O28 La2 O41 La3 -85.3(2) 17_667 . . 9_456 ?
Ni2 La2 O41 La3 114.2(3) . . . 9_456 ?
La4 La2 O41 La3 21.9(3) . . . 9_456 ?
O4 Ni3 O42 La1 109.6(3) . . . . ?
O2 Ni3 O42 La1 -64.0(3) . . . . ?
N1 Ni3 O42 La1 114.7(17) . . . . ?
O20 Ni3 O42 La1 -155.2(3) 5_465 . . . ?
O5 Ni3 O42 La1 24.2(3) . . . . ?
La3 Ni3 O42 La1 122.1(4) . . . . ?
O4 Ni3 O42 La3 -12.5(2) . . . . ?
O2 Ni3 O42 La3 173.9(2) . . . . ?
N1 Ni3 O42 La3 -7.4(19) . . . . ?
O20 Ni3 O42 La3 82.7(2) 5_465 . . . ?
O5 Ni3 O42 La3 -97.9(2) . . . . ?
O39 La1 O42 Ni3 -0.8(5) . . . . ?
O43 La1 O42 Ni3 120.3(3) . . . . ?
O27 La1 O42 Ni3 -96.2(3) . . . . ?
O36 La1 O42 Ni3 -166.2(4) . . . . ?
O6 La1 O42 Ni3 -7.8(3) . . . . ?
O28 La1 O42 Ni3 159.1(2) 17_667 . . . ?
O29 La1 O42 Ni3 -91.4(3) . . . . ?
O9 La1 O42 Ni3 59.6(3) . . . . ?
N8 La1 O42 Ni3 -94.5(3) . . . . ?
La3 La1 O42 Ni3 -56.5(4) 17_667 . . . ?
La3 La1 O42 Ni3 -118.3(4) . . . . ?
O39 La1 O42 La3 117.5(3) . . . . ?
O43 La1 O42 La3 -121.4(2) . . . . ?
O27 La1 O42 La3 22.09(17) . . . . ?
O36 La1 O42 La3 -47.8(3) . . . . ?
O6 La1 O42 La3 110.5(2) . . . . ?
O28 La1 O42 La3 -82.6(3) 17_667 . . . ?
O29 La1 O42 La3 26.9(2) . . . . ?
O9 La1 O42 La3 177.90(19) . . . . ?
N8 La1 O42 La3 23.8(2) . . . . ?
La3 La1 O42 La3 61.8(2) 17_667 . . . ?
O39 La3 O42 Ni3 67.5(2) 21_676 . . . ?
O29 La3 O42 Ni3 156.68(19) 21_676 . . . ?
O27 La3 O42 Ni3 115.0(2) . . . . ?
O41 La3 O42 Ni3 -104.2(2) 5_465 . . . ?
O19 La3 O42 Ni3 -62.8(2) 5_465 . . . ?
O4 La3 O42 Ni3 10.61(17) . . . . ?
O8 La3 O42 Ni3 -12.1(3) 21_676 . . . ?
O37 La3 O42 Ni3 -150.5(2) . . . . ?
Ni4 La3 O42 Ni3 30.8(2) . . . . ?
Ni2 La3 O42 Ni3 -74.93(17) 5_465 . . . ?
O39 La3 O42 La1 -70.0(2) 21_676 . . . ?
O29 La3 O42 La1 19.1(3) 21_676 . . . ?
O27 La3 O42 La1 -22.57(17) . . . . ?
O41 La3 O42 La1 118.3(2) 5_465 . . . ?
O19 La3 O42 La1 159.6(2) 5_465 . . . ?
O4 La3 O42 La1 -126.9(2) . . . . ?
O8 La3 O42 La1 -149.62(18) 21_676 . . . ?
O37 La3 O42 La1 72.0(2) . . . . ?
Ni3 La3 O42 La1 -137.5(3) . . . . ?
Ni4 La3 O42 La1 -106.71(15) . . . . ?
Ni2 La3 O42 La1 147.52(13) 5_465 . . . ?
O9 Ni1 O43 La1 -6.6(2) . . . . ?
O14 Ni1 O43 La1 167.1(2) . . . . ?
O12 Ni1 O43 La1 -101.4(2) . . . . ?
O44 Ni1 O43 La1 83.8(3) . . . . ?
N3 Ni1 O43 La1 -56.8(8) . . . . ?
O9 Ni1 O43 La2 112.4(2) . . . . ?
O14 Ni1 O43 La2 -73.9(2) . . . . ?
O12 Ni1 O43 La2 17.5(2) . . . . ?
O44 Ni1 O43 La2 -157.2(2) . . . . ?
N3 Ni1 O43 La2 62.2(8) . . . . ?
O39 La1 O43 Ni1 47.6(3) . . . . ?
O42 La1 O43 Ni1 -94.8(2) . . . . ?
O27 La1 O43 Ni1 -139.3(2) . . . . ?
O36 La1 O43 Ni1 177.9(3) . . . . ?
O6 La1 O43 Ni1 -28.1(3) . . . . ?
O28 La1 O43 Ni1 107.3(2) 17_667 . . . ?
O29 La1 O43 Ni1 147.3(2) . . . . ?
O9 La1 O43 Ni1 5.5(2) . . . . ?
N8 La1 O43 Ni1 -168.8(2) . . . . ?
La3 La1 O43 Ni1 81.7(3) 17_667 . . . ?
La3 La1 O43 Ni1 -125.5(2) . . . . ?
O39 La1 O43 La2 -68.0(3) . . . . ?
O42 La1 O43 La2 149.6(2) . . . . ?
O27 La1 O43 La2 105.0(2) . . . . ?
O36 La1 O43 La2 62.2(2) . . . . ?
O6 La1 O43 La2 -143.78(19) . . . . ?
O28 La1 O43 La2 -8.38(19) 17_667 . . . ?
O29 La1 O43 La2 31.6(4) . . . . ?
O9 La1 O43 La2 -110.1(2) . . . . ?
N8 La1 O43 La2 75.5(4) . . . . ?
La3 La1 O43 La2 -33.9(4) 17_667 . . . ?
La3 La1 O43 La2 118.88(18) . . . . ?
O41 La2 O43 Ni1 -60.2(3) . . . . ?
O40 La2 O43 Ni1 104.1(2) . . . . ?
O37 La2 O43 Ni1 -156.8(3) 9_456 . . . ?
O18 La2 O43 Ni1 20.0(3) . . . . ?
O48 La2 O43 Ni1 146.6(4) . . . . ?
O38 La2 O43 Ni1 -178.0(3) 9_456 . . . ?
O12 La2 O43 Ni1 -15.04(18) . . . . ?
O13 La2 O43 Ni1 60.3(2) . . . . ?
O28 La2 O43 Ni1 -110.2(2) 17_667 . . . ?
Ni2 La2 O43 Ni1 -21.8(3) . . . . ?
La4 La2 O43 Ni1 132.17(18) . . . . ?
O41 La2 O43 La1 58.1(3) . . . . ?
O40 La2 O43 La1 -137.6(2) . . . . ?
O37 La2 O43 La1 -38.5(5) 9_456 . . . ?
O18 La2 O43 La1 138.24(19) . . . . ?
O48 La2 O43 La1 -95.1(4) . . . . ?
O38 La2 O43 La1 -59.7(3) 9_456 . . . ?
O12 La2 O43 La1 103.2(2) . . . . ?
O13 La2 O43 La1 178.6(3) . . . . ?
O28 La2 O43 La1 8.02(18) 17_667 . . . ?
Ni2 La2 O43 La1 96.4(2) . . . . ?
La4 La2 O43 La1 -109.56(18) . . . . ?
O48 La4 O48 La2 -143.4(2) 5_465 . . . ?
O48 La4 O48 La2 -47.5(8) 9_456 . . . ?
O40 La4 O48 La2 -100.2(7) 9_456 . . . ?
O40 La4 O48 La2 152.0(7) 5_465 . . . ?
O40 La4 O48 La2 14.3(4) . . . . ?
O16 La4 O48 La2 81.2(5) . . . . ?
O16 La4 O48 La2 133.8(3) 5_465 . . . ?
O16 La4 O48 La2 35.1(8) 9_456 . . . ?
Ni5 La4 O48 La2 46.9(4) . . . . ?
Ni5 La4 O48 La2 10(2) 9_456 . . . ?
Ni5 La4 O48 La2 137.9(5) 5_465 . . . ?
O41 La2 O48 La4 101.1(6) . . . . ?
O40 La2 O48 La4 -14.6(4) . . . . ?
O43 La2 O48 La4 -154.5(7) . . . . ?
O37 La2 O48 La4 52.7(5) 9_456 . . . ?
O18 La2 O48 La4 -37.8(8) . . . . ?
O38 La2 O48 La4 68.5(5) 9_456 . . . ?
O12 La2 O48 La4 -134.2(4) . . . . ?
O13 La2 O48 La4 -80.8(5) . . . . ?
O28 La2 O48 La4 137.0(5) 17_667 . . . ?
Ni2 La2 O48 La4 -23(2) . . . . ?
O4 Ni3 N1 C2 -152.5(6) . . . . ?
O2 Ni3 N1 C2 21.1(6) . . . . ?
O42 Ni3 N1 C2 -157.7(16) . . . . ?
O20 Ni3 N1 C2 112.1(6) 5_465 . . . ?
O5 Ni3 N1 C2 -66.2(6) . . . . ?
La3 Ni3 N1 C2 -164.3(5) . . . . ?
O4 Ni3 N1 C3 -26.0(5) . . . . ?
O2 Ni3 N1 C3 147.6(5) . . . . ?
O42 Ni3 N1 C3 -31(2) . . . . ?
O20 Ni3 N1 C3 -121.4(5) 5_465 . . . ?
O5 Ni3 N1 C3 60.2(5) . . . . ?
La3 Ni3 N1 C3 -37.8(6) . . . . ?
O9 Ni1 N3 C10 7.4(6) . . . . ?
O14 Ni1 N3 C10 -165.1(6) . . . . ?
O43 Ni1 N3 C10 57.5(10) . . . . ?
O12 Ni1 N3 C10 102.5(6) . . . . ?
O44 Ni1 N3 C10 -83.2(6) . . . . ?
O9 Ni1 N3 C11 -116.7(5) . . . . ?
O14 Ni1 N3 C11 70.9(5) . . . . ?
O43 Ni1 N3 C11 -66.5(9) . . . . ?
O12 Ni1 N3 C11 -21.6(5) . . . . ?
O44 Ni1 N3 C11 152.8(5) . . . . ?
O40 Ni5 N4 C14 -54.1(12) . . . . ?
O17 Ni5 N4 C14 81.3(6) . . . . ?
O15 Ni5 N4 C14 169.2(6) 9_456 . . . ?
O13 Ni5 N4 C14 -8.8(6) . . . . ?
O16 Ni5 N4 C14 -100.4(6) . . . . ?
La4 Ni5 N4 C14 -100.6(6) . . . . ?
O40 Ni5 N4 C15 68.9(11) . . . . ?
O17 Ni5 N4 C15 -155.7(6) . . . . ?
O15 Ni5 N4 C15 -67.8(6) 9_456 . . . ?
O13 Ni5 N4 C15 114.2(6) . . . . ?
O16 Ni5 N4 C15 22.5(6) . . . . ?
La4 Ni5 N4 C15 22.4(7) . . . . ?
O41 Ni2 N5 C18 -71.7(9) . . . . ?
O18 Ni2 N5 C18 -23.5(5) . . . . ?
O7 Ni2 N5 C18 150.0(5) 17_667 . . . ?
O19 Ni2 N5 C18 -115.3(5) . . . . ?
O11 Ni2 N5 C18 65.6(5) . . . . ?
Na Ni2 N5 C18 107.8(5) . . . . ?
La2 Ni2 N5 C18 -25.4(6) . . . . ?
La3 Ni2 N5 C18 -117.6(5) 9_456 . . . ?
O41 Ni2 N5 C19 51.6(10) . . . . ?
O18 Ni2 N5 C19 99.8(5) . . . . ?
O7 Ni2 N5 C19 -86.7(5) 17_667 . . . ?
O19 Ni2 N5 C19 8.0(5) . . . . ?
O11 Ni2 N5 C19 -171.1(5) . . . . ?
Na Ni2 N5 C19 -128.9(5) . . . . ?
La2 Ni2 N5 C19 97.9(5) . . . . ?
La3 Ni2 N5 C19 5.7(6) 9_456 . . . ?
Ni3 O2 C1 O1 -175.3(8) . . . . ?
Ni3 O2 C1 C2 2.0(11) . . . . ?
C3 N1 C2 C1 -146.3(7) . . . . ?
Ni3 N1 C2 C1 -25.2(9) . . . . ?
O1 C1 C2 N1 -166.0(9) . . . . ?
O2 C1 C2 N1 16.5(12) . . . . ?
C2 N1 C3 C4 149.0(7) . . . . ?
Ni3 N1 C3 C4 27.8(7) . . . . ?
Ni4 O3 C4 O4 -3.3(11) . . . . ?
Ni4 O3 C4 C3 178.3(5) . . . . ?
Ni3 O4 C4 O3 172.5(6) . . . . ?
La3 O4 C4 O3 4.1(15) . . . . ?
Ni3 O4 C4 C3 -9.2(9) . . . . ?
La3 O4 C4 C3 -177.5(6) . . . . ?
N1 C3 C4 O3 165.0(7) . . . . ?
N1 C3 C4 O4 -13.5(10) . . . . ?
Ni3 O5 C5 O6 57.5(11) . . . . ?
Ni3 O5 C5 C6 -122.8(7) . . . . ?
Ni4 O6 C5 O5 174.0(6) 17_667 . . . ?
La1 O6 C5 O5 -23.1(14) . . . . ?
Ni4 O6 C5 C6 -5.8(9) 17_667 . . . ?
La1 O6 C5 C6 157.2(6) . . . . ?
C7 N2 C6 C5 91.0(9) . . . . ?
Ni4 N2 C6 C5 -27.9(8) 17_667 . . . ?
O5 C5 C6 N2 -155.8(7) . . . . ?
O6 C5 C6 N2 24.0(11) . . . . ?
C6 N2 C7 C8 -105.3(8) . . . . ?
Ni4 N2 C7 C8 12.6(8) 17_667 . . . ?
Ni2 O7 C8 O8 7.3(11) 21_676 . . . ?
Na O7 C8 O8 155.0(6) 21_676 . . . ?
Ni2 O7 C8 C7 -173.7(5) 21_676 . . . ?
Na O7 C8 C7 -26.1(10) 21_676 . . . ?
Ni4 O8 C8 O7 170.8(6) 17_667 . . . ?
La3 O8 C8 O7 7.8(13) 17_667 . . . ?
Ni4 O8 C8 C7 -8.2(9) 17_667 . . . ?
La3 O8 C8 C7 -171.2(6) 17_667 . . . ?
N2 C7 C8 O7 177.4(7) . . . . ?
N2 C7 C8 O8 -3.6(11) . . . . ?
Ni4 O10 C9 O9 -10.5(12) 17_667 . . . ?
Ni4 O10 C9 C10 171.7(6) 17_667 . . . ?
Ni1 O9 C9 O10 -174.2(7) . . . . ?
La1 O9 C9 O10 10.0(14) . . . . ?
Ni1 O9 C9 C10 3.6(10) . . . . ?
La1 O9 C9 C10 -172.2(7) . . . . ?
C11 N3 C10 C9 111.1(9) . . . . ?
Ni1 N3 C10 C9 -7.7(11) . . . . ?
O10 C9 C10 N3 -178.8(8) . . . . ?
O9 C9 C10 N3 3.2(13) . . . . ?
C10 N3 C11 C12 -94.4(9) . . . . ?
Ni1 N3 C11 C12 24.7(8) . . . . ?
Ni2 O11 C12 O12 -5.7(11) . . . . ?
Na O11 C12 O12 144.6(6) . . . . ?
Ni2 O11 C12 C11 174.3(5) . . . . ?
Na O11 C12 C11 -35.4(10) . . . . ?
Ni1 O12 C12 O11 173.8(6) . . . . ?
La2 O12 C12 O11 23.1(12) . . . . ?
Ni1 O12 C12 C11 -6.1(8) . . . . ?
La2 O12 C12 C11 -156.9(6) . . . . ?
N3 C11 C12 O11 166.6(7) . . . . ?
N3 C11 C12 O12 -13.4(11) . . . . ?
Ni1 O14 C13 O13 4.1(12) . . . . ?
Ni1 O14 C13 C14 -177.1(6) . . . . ?
Ni5 O13 C13 O14 174.6(7) . . . . ?
La2 O13 C13 O14 8.7(15) . . . . ?
Ni5 O13 C13 C14 -4.2(10) . . . . ?
La2 O13 C13 C14 -170.0(7) . . . . ?
C15 N4 C14 C13 -108.9(9) . . . . ?
Ni5 N4 C14 C13 9.2(10) . . . . ?
O14 C13 C14 N4 177.4(8) . . . . ?
O13 C13 C14 N4 -3.8(13) . . . . ?
C14 N4 C15 C16 90.6(10) . . . . ?
Ni5 N4 C15 C16 -28.6(10) . . . . ?
Ni5 O15 C16 O16 3.1(12) 5_465 . . . ?
Ni5 O15 C16 C15 -173.2(6) 5_465 . . . ?
Ni5 O16 C16 O15 -176.5(6) . . . . ?
La4 O16 C16 O15 -18.6(14) . . . . ?
Ni5 O16 C16 C15 -0.3(10) . . . . ?
La4 O16 C16 C15 157.6(7) . . . . ?
N4 C15 C16 O15 -162.8(8) . . . . ?
N4 C15 C16 O16 20.7(12) . . . . ?
Ni5 O17 C17 O18 -1.6(13) . . . . ?
Ni5 O17 C17 C18 174.6(6) . . . . ?
Ni2 O18 C17 O17 175.8(8) . . . . ?
La2 O18 C17 O17 14.7(15) . . . . ?
Ni2 O18 C17 C18 -0.5(9) . . . . ?
La2 O18 C17 C18 -161.5(6) . . . . ?
C19 N5 C18 C17 -90.6(9) . . . . ?
Ni2 N5 C18 C17 29.2(8) . . . . ?
O17 C17 C18 N5 162.4(8) . . . . ?
O18 C17 C18 N5 -20.9(11) . . . . ?
C18 N5 C19 C20 108.1(8) . . . . ?
Ni2 N5 C19 C20 -10.1(8) . . . . ?
Ni3 O20 C20 O19 22.4(11) 9_456 . . . ?
Ni3 O20 C20 C19 -155.1(6) 9_456 . . . ?
Ni2 O19 C20 O20 -177.2(6) . . . . ?
La3 O19 C20 O20 -9.0(13) 9_456 . . . ?
Ni2 O19 C20 C19 0.2(9) . . . . ?
La3 O19 C20 C19 168.4(6) 9_456 . . . ?
N5 C19 C20 O20 -175.3(7) . . . . ?
N5 C19 C20 O19 7.1(11) . . . . ?
La6 O45 La6 O45 -128(18) 9_456 . . 5_465 ?
La6 O45 La6 O45 -71(60) 5_465 . . 5_465 ?
La6 O45 La6 O45 -48.2(13) 17_667 . . 5_465 ?
La6 O45 La6 O45 -45.7(10) 21_676 . . 5_465 ?
La6 O45 La6 O45 -48.9(8) 13_577 . . 5_465 ?
La6 O45 La6 O45 -31(17) 9_456 . . 9_456 ?
La6 O45 La6 O45 26(60) 5_465 . . 9_456 ?
La6 O45 La6 O45 48.5(19) 17_667 . . 9_456 ?
La6 O45 La6 O45 51.0(8) 21_676 . . 9_456 ?
La6 O45 La6 O45 47.8(5) 13_577 . . 9_456 ?
La6 O45 La6 O38 116(19) 9_456 . . 5_465 ?
La6 O45 La6 O38 172(61) 5_465 . . 5_465 ?
La6 O45 La6 O38 -164.9(6) 17_667 . . 5_465 ?
La6 O45 La6 O38 -162.4(13) 21_676 . . 5_465 ?
La6 O45 La6 O38 -166(2) 13_577 . . 5_465 ?
La6 O45 La6 O45 -135(18) 9_456 . . 21_676 ?
La6 O45 La6 O45 -79(61) 5_465 . . 21_676 ?
La6 O45 La6 O45 -56.0(10) 17_667 . . 21_676 ?
La6 O45 La6 O45 -53.6(9) 21_676 . . 21_676 ?
La6 O45 La6 O45 -56.8(13) 13_577 . . 21_676 ?
La6 O45 La6 O38 147(22) 9_456 . . 9_456 ?
La6 O45 La6 O38 -157(64) 5_465 . . 9_456 ?
La6 O45 La6 O38 -134(3) 17_667 . . 9_456 ?
La6 O45 La6 O38 -131(4) 21_676 . . 9_456 ?
La6 O45 La6 O38 -135(5) 13_577 . . 9_456 ?
La6 O45 La6 O38 49(19) 9_456 . . . ?
La6 O45 La6 O38 105(61) 5_465 . . . ?
La6 O45 La6 O38 128.0(10) 17_667 . . . ?
La6 O45 La6 O38 130.5(9) 21_676 . . . ?
La6 O45 La6 O38 127.3(18) 13_577 . . . ?
La6 O45 La6 O45 -25(18) 9_456 . . 17_667 ?
La6 O45 La6 O45 32(61) 5_465 . . 17_667 ?
La6 O45 La6 O45 54.4(12) 17_667 . . 17_667 ?
La6 O45 La6 O45 56.9(8) 21_676 . . 17_667 ?
La6 O45 La6 O45 53.7(12) 13_577 . . 17_667 ?
La6 O45 La6 O45 -79(17) 9_456 . . 13_577 ?
La6 O45 La6 O45 -22(60) 5_465 . . 13_577 ?
La6 O45 La6 O45 0.7(19) 17_667 . . 13_577 ?
La6 O45 La6 O45 3.2(10) 21_676 . . 13_577 ?
La6 O45 La6 O45 -0.001(2) 13_577 . . 13_577 ?
La6 O45 La6 O36 178(100) 9_456 . . 9_456 ?
La6 O45 La6 O36 -125(61) 5_465 . . 9_456 ?
La6 O45 La6 O36 -102.5(4) 17_667 . . 9_456 ?
La6 O45 La6 O36 -100.0(13) 21_676 . . 9_456 ?
La6 O45 La6 O36 -103.2(18) 13_577 . . 9_456 ?
La6 O45 La6 O36 70(18) 9_456 . . 5_465 ?
La6 O45 La6 O36 126(61) 5_465 . . 5_465 ?
La6 O45 La6 O36 148.9(10) 17_667 . . 5_465 ?
La6 O45 La6 O36 151.4(8) 21_676 . . 5_465 ?
La6 O45 La6 O36 148.2(14) 13_577 . . 5_465 ?
La6 O45 La6 C22 95(19) 9_456 . . 5_465 ?
La6 O45 La6 C22 152(61) 5_465 . . 5_465 ?
La6 O45 La6 C22 174.5(8) 17_667 . . 5_465 ?
La6 O45 La6 C22 177.0(9) 21_676 . . 5_465 ?
La6 O45 La6 C22 173.8(15) 13_577 . . 5_465 ?
C22 O38 La6 O45 -138.4(11) . . . . ?
La6 O38 La6 O45 -86(44) 9_456 . . . ?
La6 O38 La6 O45 -147(25) 5_465 . . . ?
La2 O38 La6 O45 -0.9(17) 5_465 . . . ?
C22 O38 La6 O45 35(2) . . . 5_465 ?
La6 O38 La6 O45 87(42) 9_456 . . 5_465 ?
La6 O38 La6 O45 26(23) 5_465 . . 5_465 ?
La2 O38 La6 O45 172.5(13) 5_465 . . 5_465 ?
C22 O38 La6 O45 -46.7(14) . . . 9_456 ?
La6 O38 La6 O45 5(42) 9_456 . . 9_456 ?
La6 O38 La6 O45 -55(24) 5_465 . . 9_456 ?
La2 O38 La6 O45 90.9(12) 5_465 . . 9_456 ?
C22 O38 La6 O38 148.9(10) . . . 5_465 ?
La6 O38 La6 O38 -159(44) 9_456 . . 5_465 ?
La6 O38 La6 O38 140(25) 5_465 . . 5_465 ?
La2 O38 La6 O38 -73.5(14) 5_465 . . 5_465 ?
C22 O38 La6 O45 -150(4) . . . 21_676 ?
La6 O38 La6 O45 -98(46) 9_456 . . 21_676 ?
La6 O38 La6 O45 -159(28) 5_465 . . 21_676 ?
La2 O38 La6 O45 -13(5) 5_465 . . 21_676 ?
C22 O38 La6 O38 71.2(11) . . . 9_456 ?
La6 O38 La6 O38 123(43) 9_456 . . 9_456 ?
La6 O38 La6 O38 63(25) 5_465 . . 9_456 ?
La2 O38 La6 O38 -151.3(9) 5_465 . . 9_456 ?
C22 O38 La6 O45 -91.9(12) . . . 17_667 ?
La6 O38 La6 O45 -40(43) 9_456 . . 17_667 ?
La6 O38 La6 O45 -101(24) 5_465 . . 17_667 ?
La2 O38 La6 O45 45.6(13) 5_465 . . 17_667 ?
C22 O38 La6 O45 -15.7(18) . . . 13_577 ?
La6 O38 La6 O45 36(42) 9_456 . . 13_577 ?
La6 O38 La6 O45 -24(23) 5_465 . . 13_577 ?
La2 O38 La6 O45 121.8(14) 5_465 . . 13_577 ?
C22 O38 La6 O36 97.2(13) . . . 9_456 ?
La6 O38 La6 O36 149(44) 9_456 . . 9_456 ?
La6 O38 La6 O36 88(26) 5_465 . . 9_456 ?
La2 O38 La6 O36 -125.3(14) 5_465 . . 9_456 ?
C22 O38 La6 O36 -156.8(10) . . . 5_465 ?
La6 O38 La6 O36 -105(43) 9_456 . . 5_465 ?
La6 O38 La6 O36 -165(25) 5_465 . . 5_465 ?
La2 O38 La6 O36 -19.2(10) 5_465 . . 5_465 ?
C22 O38 La6 C22 176.3(10) . . . 5_465 ?
La6 O38 La6 C22 -132(44) 9_456 . . 5_465 ?
La6 O38 La6 C22 168(25) 5_465 . . 5_465 ?
La2 O38 La6 C22 -46.2(11) 5_465 . . 5_465 ?

loop_
 _geom_hbond_atom_site_label_D
 _geom_hbond_atom_site_label_H
 _geom_hbond_atom_site_label_A
 _geom_hbond_distance_DH
 _geom_hbond_distance_HA
 _geom_hbond_distance_DA
 _geom_hbond_angle_DHA
 _geom_hbond_site_symmetry_A
N1 H1A O24  0.93 2.55 3.121(9) 119.8 5_465
N4 H4A O21  0.93 2.46 3.246(10) 141.8 22_487
N4 H4A O30  0.93 2.38 3.131(13) 137.8 22_487

_diffrn_measured_fraction_theta_max    0.998
_diffrn_reflns_theta_full              25.00
_diffrn_measured_fraction_theta_full   0.998
_refine_diff_density_max    1.939
_refine_diff_density_min   -2.856
_refine_diff_density_rms    0.207
